1  
2  
3  
4  
5  
6  
7  
8  
9  
10  
11  
12  
13  
14  
15  
16  
17  
18  
19  
20  
21  
22  
23

# The impact of coregistration of gradient recalled echo images on quantitative susceptibility and R2\* mapping at 7T

Seongjin Choi<sup>1</sup>, Xu Li<sup>2,3</sup>, and Daniel M. Harrison<sup>1</sup>

<sup>1</sup>Department of Neurology, University of Maryland School of Medicine, Baltimore, Maryland, United States of America

<sup>2</sup>F.M. Kirby Research Center for Functional Brain Imaging, Kennedy Krieger Institute, Baltimore, Maryland, United States of America

<sup>3</sup>Department of Radiology and Radiological Science, Johns Hopkins University School of Medicine, Baltimore, Maryland, United States of America

\*Corresponding author: Seongjin Choi

E-mail: [seongjin.choi@som.umaryland.edu](mailto:seongjin.choi@som.umaryland.edu) (SC)

**Grant support:** This study was funded through grants from Bayer Neurosciences, NIH/NIBIB P41EB015909 and NINDS 1K23NS072366

**Short title:** Impact of co-registration approaches on QSM and R2\*

## 24 **Abstract**

25 **Introduction:** While image coregistration is inevitable and quantitative parametric  
26 maps, such as  $R2^*$  and QSM, are increasingly used in multi-parametric studies of the  
27 brain, there is a lack of investigations on the reliability of quantitative metrics after  
28 coregistration. The purposes of this study were 1) to evaluate the reliability of  $R2^*$  and  
29 QSM at 7T and 2) to assess the statistical agreement in the quantitative metrics  
30 obtained by two different coregistration approaches.

31 **Methods:** We compared the reliability of  $R2^*$  and quantitative susceptibility maps  
32 obtained from brains of eight healthy participants by two coregistration approaches: 1)  
33 transformation of pre-processed quantitative maps and 2) processing quantitative maps  
34 after transformation using pixel- and ROI-based analyses. Two-sample Kolmogorov-  
35 Smirnov, Mann-Whitney U, Paired T, Intraclass-correlation tests were performed  
36 appropriately.

37 **Results:**  $R2^*$  remained invariant regardless of the coregistration timing. However,  
38 magnetic susceptibility was significantly altered when processed in transformed space,  
39 whereas it remained invariant in all KS-tests and pixel values were only different in 2 out  
40 of 64 U-tests for direct QSM coregistration. Paired t-test revealed that ROI-based group-  
41 mean  $R2^*$  was invariant to both approaches, while group-mean susceptibility was  
42 invariant to direct coregistration but differed in one structure processed in transformed  
43 space. For all pairs of measurements of  $R2^*$ , ICCs were excellent. ICCs for magnetic  
44 susceptibility were excellent when processed in its native space while the ICCs were  
45 lower than 0.9 or poor when processed in transformed space. Further analysis revealed  
46 that the choice of interpolation approach affected the resultant QSM.

47 **Conclusions:** Our study shows that  $R2^*$  could be safely processed in a transformed  
48 space, whereas QSM was less reliable when processed in the transformed space.  
49 Hence, caution is advised when using QSM in a multi-parametric study, and it is  
50 strongly recommended to process QSM in its native space prior to any coregistration or  
51 spatial transformation.

52

53

## 54 **Introduction**

55 Image coregistration is an inevitable step of data processing in contemporary  
56 studies using magnetic resonance imaging (MRI) data because of increasing demands  
57 for multi-parametric image analyses. Further, combined quantitative image analysis  
58 often requires coregistration of several MR images of various spatial resolutions as well  
59 as different contrasts into a common image space. Image coregistration is also  
60 essential in longitudinal studies, in which MR images are acquired and accumulated  
61 across a few time points.

62

63 Image coregistration often employs multiple sophisticated mathematical  
64 algorithms, for example, geometric transformation, interpolation, and estimation of pixel  
65 values (PVs) from a source image in a transformed space. Hence, in the transformed  
66 space, the resulting image may consist of voxels of altered spatial locations,  
67 dimensions, and intensity values compared to the original image. Therefore, some  
68 researchers may raise concerns about the reliability of metrics derived from the altered  
69 PVs in the transformed space.

70

71           Although individual PVs of the coregistered image in a transformed space may  
72 be altered, data derived from a post-registration image may still be useful for multi-  
73 parametric analyses if the descriptive statistics and the distribution profile of the PVs in  
74 structural labels or regions of interest (ROI) remain statistically identical. If the statistical  
75 features of altered PVs in the transformed space are significantly different from those of  
76 its source MR image, any metrics derived from the transformed image are not reliable  
77 and should not be considered in further analysis.

78

79           While image coregistration is inevitable and various quantitative parametric  
80 maps, such as  $R2^*$  and quantitative susceptibility mapping (QSM), are increasingly  
81 used in studies employing multiparametric assessment of the brain, there is a lack of  
82 investigations on the reliability of the derived quantitative metrics after source image  
83 coregistration. There are a limited number of studies investigating the reproducibility of  
84 QSM. [1-4] Hinoda et al. assessed the consistency and reproducibility of QSM at 3T and  
85 1.5T and demonstrated good reproducibility of QSM processed by two different  
86 background phase removal algorithms at both field strengths. [1] Deh et al. assessed  
87 the reproducibility of nonlinear MEDI-based QSM measurements in both control and  
88 patient groups for scanners from two different vendors and at both 3T and 1.5T. Their  
89 QSM measurements showed good intra-scanner and inter-scanner reproducibility for  
90 healthy and multiple sclerosis participants. [2] Santin et al. investigated the  
91 reproducibility of QSM measurements at 3T in healthy volunteers within and between  
92 different MR sessions using four different combinations of QSM reconstruction methods.

93 [3] They also investigated the reproducibility of  $R2^*$  measurements in comparison with  
94 QSM measurements. Lauzon et al. compared QSM acquired by various methodologies.  
95 [4] They showed that readout gradient polarity and accelerated parallel imaging did not  
96 alter the estimated susceptibility at 3T. In summary, these studies reported inter-vendor,  
97 inter-acquisition methods, inter/intra-scanner, inter-field (1.5 and 3T), and inter-QSM  
98 reconstruction methods agreements. More recently, a few more studies explored QSM  
99 reliability or reproducibility at ultra-high field (7T). Lancione et al. demonstrated excellent  
100 intra-scanner repeatability and inter-scanner reproducibility of QSM at both 3T and 7T  
101 within five healthy subjects of mixed gender. [5] Rua et al. investigated the  
102 reproducibility of QSM and  $R2^*$  map at 7T and showed promising results for multi-center  
103 and multi-vendor platforms within three healthy male subjects. [6] Okada et al.  
104 investigated test-retest reliability of cortical  $R2^*$  and QSM at 7T within sixteen healthy  
105 subject and both measures showed repeatable results in the wide cortical area except  
106 at the frontal-temporal base area. [7]

107  
108 However, none of these studies investigated the impact of co-registration of  
109 source gradient recalled echo (GRE) images to a non-native space on the resulting  
110 parametric maps of  $R2^*$  and quantitative susceptibility. In these studies, when inter-  
111 space coregistrations were required, the resultant quantitative maps were coregistered  
112 after being processed in their native spaces, although there has been no empirical  
113 evidence to do so. Moreover, reliabilities of QSM and  $R2^*$  maps have not been fully  
114 explored at ultra-high field (7T). In this study, we investigated the influence of two  
115 different coregistration approaches on quantitative measurements ( $R2^*$  and magnetic

116 susceptibility) acquired at 7T in particular. We examined the reliability of quantitative  
117 measures collected within four atlas-based structural labels in deep brain areas  
118 bilaterally using both pixel- and ROI-based analyses. We addressed how two  
119 coregistration approaches differently impact on R2\* map and QSM. Furthermore, we  
120 addressed how an insignificant modification of phase-image resolution led to a  
121 significant change in resultant QSM.

122

123

## 124 **Materials and Methods**

125 This study consists of two stages. Initial stage was performed to assess the  
126 reliability of 7T R2\* and QSM and impact of the coregistration approaches. Then, based  
127 on the initial analysis results, a further analysis was conducted to address the questions  
128 raised in the initial analysis.

129

## 130 **Participants**

131 Eight healthy subjects with ages ranging from 32 to 57 (four men, four women)  
132 participated in the study. The Institutional Review Boards at the Johns Hopkins  
133 University School of Medicine and the Kennedy Krieger Institute approved protocols,  
134 and all participants provided written informed consent.

135

## 136 **Acquisition**

137 MRI was acquired using a whole-body 7T Achieva MR scanner (Philips Medical

138 Systems, Cleveland, OH, USA) and a volume-transmit, 32-channel receive head coil  
139 (Nova Medical, Wilmington, MA, USA). MRI protocol consisted of a magnetization  
140 prepared rapid acquisition gradient echo sequence (MPRAGE, TR/TE = 4.1/1.83 ms,  
141 sagittal acquisition, FOV =  $180 \times 220 \times 220$  mm<sup>3</sup>, image matrix =  $180 \times 220 \times 220$ , flip  
142 angle = 7 degrees, TFE factor = 352, SENSE factor =  $2 \times 1 \times 2$ ) and a multi-echo 3D  
143 gradient-recalled echo sequence (GRE, TR/TE1/ $\Delta$ TE = 68/4/2 ms, 8 echoes, axial  
144 acquisition, FOV =  $220 \times 220 \times 110$  mm<sup>3</sup>, image matrix =  $224 \times 224 \times 110$ ) with both  
145 magnitude and phase output.

146

## 147 **Image processing**

### 148 **Preprocessing**

149 All pre- and post-processing steps were performed on a Linux (Debian 8)  
150 desktop with Neurodebian packages [8]. Before starting any image processing, all MRI  
151 data saved in Par/Rec format (Philips native format) were converted to NIfTI format  
152 using the 'parrec2nii' module in 'NIPY' package written in Python script language [9].  
153 MPRAGE data were corrected for the bias field using the N4 bias-field correction  
154 algorithm prior to linear registration [10]. Then, linear coregistration of GRE data to  
155 MPRAGE space was performed using FLIRT (FMRIB, Oxford University) with rigid body  
156 transformation [11, 12]. A transformation matrix (GRE-to-MPRAGE transformation  
157 matrix) was acquired for coregistration of the first-echo magnitude image of GRE to  
158 MPRAGE space. The first-echo magnitude was chosen because it has the least signal  
159 loss due to intra-voxel spin dephasing and ensures preserving the most brain tissues.  
160 For calculating QSM in MPRAGE space, magnitude and phase image pairs were then

161 converted to real and imaginary pairs using FSLUTILS included in FSL. The  
162 transformation matrix was then applied to the real and imaginary image pairs. Finally,  
163 the transformed real and imaginary pair was converted back to a magnitude and phase  
164 image pair for further processing in MPRAGE space. The QSM processing in a  
165 transformed space requires consideration of its dependency on coregistration  
166 transformation matrix. Hence, we assured use of a transformed dipole kernel in QSM  
167 processing in MPRAGE space by reflecting angle changes introduced by transformation  
168 matrix from GRE to MPRAGE spaces.

169

## 170 **R2\* mapping**

171 Two sets of R2\* maps were calculated in a voxel-wise manner using the power  
172 method, in which the decay of squared magnitudes from all eight echoes was fitted to a  
173 monoexponential model. [13] This was performed using an in-house tool written in  
174 MatLab (Mathworks, Inc., Natick, MA). One set of R2\* maps was calculated in its native  
175 (GRE) space, and another set was calculated from GRE data transformed to MPRAGE  
176 space. The third set of R2\* maps was acquired by direct transformation of the R2\* map  
177 in its native space to MPRAGE space using the GRE-to-MPRAGE transformation matrix  
178 acquired during preprocessing.

179

## 180 **Quantitative Susceptibility Mapping (QSM)**

181 Three sets of QSM data were also calculated for each participant. The first two  
182 sets of QSMs were processed using GRE images in native space and GRE images  
183 transformed to MPRAGE space. Although QSM can be calculated from both single-



184 echo and multi-echo GRE data [14], we only processed multi-echo QSM. QSM  
185 processing was accomplished using an in-house tool (JHU QSM Toolbox) written in  
186 Matlab. The first three echoes (at TE of 4 ms, 6 ms, and 8 ms) were excluded from  
187 calculating QSM to avoid non-linear temporal phase evolution in white matter when TE  
188 is shorter than 10 ms at ultra-high field [15, 16], and the other five echoes (with TE of 10  
189 ms to 18 ms) underwent the phase processing and were averaged to generate the final  
190 frequency map and susceptibility maps. Phase images underwent a sequential process  
191 of phase unwrapping, background-field removal, and dipole inversion. Phase  
192 unwrapping employed a Laplacian-based phase unwrapping algorithm [17]. The  
193 unwrapped phase images were then divided by  $2\pi \cdot TE$  to obtain an image of frequency  
194 shift in Hz. Background field removal was performed by the V-SHARP method [18-20]  
195 with a maximum spherical kernel size of 6 mm and TSVD threshold of 0.05. Then,  
196 dipole inversion was performed by applying a modified structural feature based  
197 collaborative reconstruction (SFCR) algorithm with only L1-norm based regularization  
198 i.e.  $\lambda_1 = \gamma_1 = 100$  and dropped L2-norm regularization i.e.  $\lambda_2 = \gamma_2 = 0$  [21]. Finally, the  
199 last set of QSM was acquired by directly coregistering QSM in native (GRE) space to  
200 MPRAGE space using the GRE-to-MPRAGE transformation matrix saved in  
201 preprocessing.

202

## 203 **Structural label preparation and data collection**

204 Two sets of structural labels in MPRAGE and GRE spaces for each participant  
205 were prepared. Atlas-based structural labels were used to avoid biases introduced by  
206 manual drawing. We used structural labels obtained from the Harvard-Oxford atlas,

207 which is included in FSL and based on T1-weighted images of 37 healthy subjects of  
208 mixed genders in standard MNI 152 space. The source atlas contained labels for each  
209 structure bilaterally. Four anatomical structures from this atlas were bilaterally selected  
210 for analysis: thalamus (TH\_L and TH\_R), caudate nucleus (CN\_L and CN\_R), globus  
211 pallidus (GP\_L and GP\_R), and putamen (PUT\_L and PUT\_R). Using FSL, the atlas-  
212 based labels were eroded by one voxel (with 3-D kernel) to ensure that measurements  
213 were performed only within the intended structures after the following image  
214 transformations and to reduce potential partial volume effect between other structures  
215 and other tissue types in the vicinity. The eroded structural labels were then inversely  
216 warped to the MPRAGE space of each participant using FNIRT available in FSL  
217 (FMRIB, Oxford University) [22]. These labels were used to collect PVs from parametric  
218 maps in MPRAGE space. Finally, the labels were linearly transformed to each  
219 participant's GRE space with the inverse of the GRE-to-MPRAGE transformation matrix.  
220 These labels were used to collect PVs from parametric maps in GRE space. Using the  
221 two sets of labels in GRE and MPRAGE spaces, we sampled voxel-based data for the  
222 selected four structures bilaterally. These pixel-based data were further used to  
223 calculate group-mean values for each structural label. Fig 1 shows the eight structures  
224 in the standard (MNI), GRE, and MPRAGE spaces of a representative participant.

225

226 **Fig 1. Example of structural labels in a representative participant.**

227 Axial (top row) and coronal (bottom row) views of four bilateral (thus 8) structural labels  
228 in three spaces: MNI (left), MPRAGE (center), and GRE (right) spaces. Caudate  
229 nucleus (red, CN), putamen (green, PUT), globus pallidus (purple, GP), and thalamus

230 (blue, TH) were bilaterally segmented using the Harvard-Oxford Atlas available in FSL.  
231 Colored structures are the results of erosion of the source structures (white) using one-  
232 voxel sized 3-D kernel.

233

## 234 **Data analysis**

235 All statistical analyses and data visualization were carried out using R software  
236 package (R Core team, Vienna, Austria). P-values less than 0.05 were considered as  
237 significant for all analyses. Adjustments for multiple comparisons were not performed  
238 due to the small sample size and exploratory nature of this study.

239

## 240 **Pixel-based analysis**

241 We assessed the reliability of quantitative  $R2^*$  and QSM metrics processed and  
242 collected in transformed space versus those processed in native space but collected in  
243 transformed space by comparing PV distributions and PV similarity in reference to  
244 metrics from  $R2^*$  and QSM processed and collected in native space.

245

246 Since all sampled data violated the assumption of normal distribution, non-  
247 parametric methods were employed to evaluate the reliability of PVs. We selected the  
248 ‘Two-sample Kolmogorov-Smirnov test (KS-test)’ to assess the distribution equality of  
249 two compared data sets. The result of KS test is the D-statistic, which quantifies a  
250 distance between empirical distribution functions of the two compared data sets. We  
251 also used the ‘Man-Whitney U-test (U-test)’ to check differences between two compared  
252 data sets.

253

## 254 **Region-of-Interest (ROI) based analysis**

255         The purpose of this analysis was to investigate ROI-based group mean  
256 comparison. This type of comparison is usually performed to detect statistical difference  
257 between two groups, e.g. patient group versus controls. In our study, we applied this  
258 analysis to examine the reliability of group mean (of all subjects) of R2\* and magnetic  
259 susceptibility values in eight structures. The mean values of R2\* and QSM for each  
260 structure were calculated using PVs from the pixel-based analysis. We performed a  
261 qualitative review of mean metrics using bar plots. The 'Paired t-test' was used to  
262 assess the reliability of the mean metrics before and after linear coregistration.

263

264         In addition to the paired t-test, we also conducted intra-class correlation (ICC)  
265 test. ICC estimates and their 95% confidence intervals were calculated based on single  
266 measurement, absolute agreement, and two-way mixed effects model using 'irr'  
267 package available for R. The purpose of this ICC analysis was to assess the agreement  
268 between mean quantitative metrics for each structure acquired in GRE and MPRAGE  
269 spaces across all subjects.

270

## 271 **Further analysis on the impact of interpolating source GRE on** 272 **resultant QSM**

273         Noticing that coregistration included interpolation of images during alignment of  
274 two images, we investigated the impact of the interpolation of the source GRE image on  
275 the resultant QSM by interpolating GRE image to the resolution of MPRAGE image.

276 Another QSM was then processed in GRE space by directly interpolating to the  
277 MRPAGE space resolution for comparison. The QSM results, which were processed in  
278 its native GRE and an interpolated GRE spaces, were examined by comparing images,  
279 density plots and distance measured by D-statistic from KS-test. Further, we attempted  
280 observing the error propagation along the QSM processing chain.

281

282

## 283 **Results**

### 284 **Pixel-based analysis**

285 R2\* maps were robust to both coregistration approaches. Fig 2 visualizes KS-test  
286 results by comparing the empirical cumulative distribution function (ECDF) of R2\* maps.  
287 KS- and U-test results comparing PVs of R2\* maps showed no significant difference  
288 caused by either GRE to MPRAGE coregistration (D-statistic ranged from 0.008670 to  
289 0.03769, U-statistic ranged from 94387 to 16655829, all  $p > 0.05$ ) or direct R2\*  
290 coregistration to MPRAGE space (D-statistic ranged from 0.007509 to 0.4770, all  $p >$   
291 0.05, U-statistic ranged from 94889 to 16684842, all  $p > 0.05$ ). Complete tables for KS-  
292 and U-tests results for R2\* metrics is provided in S1 and S2 Tables.

293

294 **Fig 2. Empirical cumulative distribution functions (ECDF) of R2\* maps acquired**  
295 **using two different coregistration approaches in a representative participant.**

296 (a) ECDF's of R2\* pixel values acquired from its native GRE space (red) and from GRE  
297 data transformed to MPRAGE space (cyan) were overlaid. In this approach, R2\*  
298 calculation was performed after the coregistration of GRE data to MPRAGE space. (b)

299 ECDFs of R2\* pixel values acquired from its native GRE space (red) and from R2\* map  
300 directly coregistered to MPRAGE space (cyan) were overlaid. In this approach, R2\*  
301 map calculation is performed in its native space and, then, the resultant R2\* map is  
302 coregistered to MPRAGE space. All ECDFs showed excellent agreement for the  
303 distributions of PVs. Similar results were confirmed in all participants. Regardless of the  
304 differences in processing steps, ECDF's from both methods are well overlapped without  
305 significant differences in R2\* values.

306

307 Fig 3 (a) visualizes discrepancies found between PV distributions of QSMs  
308 processed in GRE and in MPRAGE spaces as poorly matched ECDFs. KS-tests  
309 detected differences in 61 out of 64 structures (8 structural labels x 8 participants). U-  
310 tests found differences in 55 out of 64 structures. A full result is provided in S3 Table.  
311 On the other hand, Fig 3 (b) visualizes good agreement between QSMs processed in  
312 GRE space and directly coregistered to MPRAGE space. KS-tests detected differences  
313 in only 1 out of 64 structures. U-tests found differences in only 1 out of 64 structures. A  
314 full table of the results is provided in S4 Table. Our KS- and U-test results showed that  
315 susceptibility measurements were significantly altered in most structures of all  
316 participants after the coregistration of GRE images to MPRAGE space. In general,  
317 these results indicate that linear coregistration of the source GRE images significantly  
318 altered the distribution and PVs of the resultant QSM, while direct coregistration of QSM  
319 to a reference space did not alter the distributions and PVs.

320

321 **Fig 3. Empirical cumulative distribution functions (ECDF) of QSM by two different**  
322 **coregistration approaches.**

323 (a) ECDFs of magnetic susceptibility pixel values acquired from its native GRE space  
324 (red) and from GRE data transformed to MPRAGE space (cyan) were overlaid. In this  
325 approach, QSM calculation was performed after the coregistration of GRE data to  
326 MPRAGE space. (b) ECDFs of magnetic susceptibility pixel values acquired from QSM  
327 in GRE space (red) and the QSM directly coregistered to MPRAGE space (cyan) were  
328 overlaid. In this approach, QSM calculation was performed first and, then, the QSM was  
329 coregistered to MPRAGE space. Significant discrepancies were observed between  
330 QSM in GRE and MPRAGE spaces when the source GRE was transformed to  
331 MPRAGE space prior to QSM processing. On the contrary, the QSM-calculation-then-  
332 coregistration approach did not show significant differences in the pixel-based analysis  
333 except in one structure in one participant

334  
335 Further analysis of frequency maps in an effort to investigate the discrepancy  
336 between QSMs acquired by two coregistration approaches was performed. Figure 4  
337 shows one of the results in a representative participant. Noticeable differences were  
338 observed in 6 out of 8 structures between frequency maps processed in GRE and  
339 MPRAGE spaces respectively. ECDFs of frequency maps of Left and right putamen  
340 (PUT\_L and PUT\_R) did not show apparent discrepancies in this specific case. The  
341 differences between frequency maps did not result in a predictable matter in QSMs.  
342 Instead, corresponding QSM in PUT\_L and PUT\_R were significantly different between

343 spaces where QSMs were processed as seen in Fig 3 (a). A full table of this analysis is  
344 provides in S5 Table.

345

346 **Fig 4. Empirical cumulative distribution functions (ECDF) of frequency maps by**  
347 **two different coregistration approaches.**

348 ECDFs in 8 structural labels of frequency map acquired after coregistration of source  
349 GRE data to MPRAGE space (cyan) as compared to the corresponding frequency and  
350 QSM in its native GRE space (red) in a representative participant. Relatively better  
351 overlapped ECDFs in PUT\_L and PUT\_R of frequency maps did not lead to better  
352 overlapped ECDFs of QSM, which still showed significant differences in the two  
353 structures as seen in Fig 3 (a).

354

## 355 **Region-of-Interest (ROI) based analysis**

356 The paired t-test was conducted on the paired group-mean measurement, which  
357 is the mean (8 subjects) of means (intra-structure). The group-mean measurements of  
358  $R2^*$  were statistically equivalent ( $p > 0.05$  for all structures) as shown in Table 1 and 2.  
359 Fig 5 shows group-mean measurements of  $R2^*$  within each structure of all participants  
360 for both coregistration approaches. This indicates that group-mean  $R2^*$  is reliable to  
361 either coregistration of GRE data to MPRAGE space (Fig 5 (a)) or its direct  
362 coregistration to MPRAGE space (Fig 5 (b)) in all structures.

363

364 **Fig 5. Comparison of group-mean  $R2^*$  acquired by two different coregistration**  
365 **approaches.**



366 R2\* was robust to either coregistration of source GRE data to MPRAGE space (a) or its  
367 direct coregistration to MPRAGE space (b) in all structures. See also Tables 1 and 2.

368 (TH\_L: left thalamus, TH\_R: right thalamus, CN\_L: left caudate nucleus, CN\_R: right  
369 caudate nucleus, GP\_L: left globus pallidus, GP\_R: right globus pallidus, PUT\_L: left  
370 putamen, PUT\_R: right putamen)

371

372

373 **Table 1. Mean R2\* (in the unit of Hz) comparison by paired T-test for**  
374 **coregistration of source GRE data to MPRAGE space before R2\* calculation.**

| structure | mean R2* (SD)<br>in GRE space | mean R2* (SD)<br>in MPRAGE space | P-value (CI)            |
|-----------|-------------------------------|----------------------------------|-------------------------|
| CN_L      | 46.4 (5.22)                   | 46.4 (5.24)                      | 0.154 (-0.118, 0.0229)  |
| CN_R      | 44.5 (4.07)                   | 44.6 (4.09)                      | 0.776 (-0.168, 0.13)    |
| GP_L      | 87.8 (13.9)                   | 87.9 (13.7)                      | 0.679 (-0.494, 0.341)   |
| GP_R      | 87 (16.2)                     | 87.1 (16.1)                      | 0.385 (-0.284, 0.124)   |
| PUT_L     | 53.3 (7.68)                   | 53.3 (7.6)                       | 0.678 (-0.267, 0.185)   |
| PUT_R     | 55.7 (9.79)                   | 55.7 (9.86)                      | 0.747 (-0.143, 0.19)    |
| TH_L      | 39.5 (3.05)                   | 39.6 (3.04)                      | 0.164 (-0.0995, 0.0205) |
| TH_R      | 40.6 (4.92)                   | 40.6 (4.96)                      | 0.596 (-0.0434, 0.07)   |

375

376 SD: Standard deviation, CI: Confidence interval

377 CN\_L: left caudate nucleus, CN\_R: right caudate nucleus, GP\_L: left globus pallidus,  
378 GP\_R: right globus pallidus, PUT\_L: left putamen, PUT\_R: right putamen, TH\_L: left  
379 thalamus, TH\_R: right thalamus

380

381

382 **Table 2. Mean R2\* (in the unit of Hz) comparison by paired T-test for direct**  
383 **coregistration of R2\* map in GRE space to MPRAGE space.**

| structure | mean R2* (SD)<br>in GRE space | mean R2* (SD)<br>in MPRAGE space | P-value (CI)            |
|-----------|-------------------------------|----------------------------------|-------------------------|
| CN_L      | 46.4 (5.22)                   | 46.4 (5.25)                      | 0.59 (-0.0925, 0.0568)  |
| CN_R      | 44.5 (4.07)                   | 44.5 (4.09)                      | 0.991 (-0.117, 0.116)   |
| GP_L      | 87.8 (13.9)                   | 88 (13.8)                        | 0.406 (-0.52, 0.237)    |
| GP_R      | 87 (16.2)                     | 87.1 (16.1)                      | 0.913 (-0.254, 0.231)   |
| PUT_L     | 53.3 (7.68)                   | 53.3 (7.55)                      | 0.543 (-0.255, 0.147)   |
| PUT_R     | 55.7 (9.79)                   | 55.7 (9.89)                      | 0.563 (-0.146, 0.247)   |
| TH_L      | 39.5 (3.05)                   | 39.6 (3.02)                      | 0.155 (-0.0656, 0.0127) |
| TH_R      | 40.6 (4.92)                   | 40.5 (4.96)                      | 0.208 (-0.0321, 0.123)  |

384

385 SD: Standard deviation, CI: Confidence interval

386 CN\_L: left caudate nucleus, CN\_R: right caudate nucleus, GP\_L: left globus pallidus,  
387 GP\_R: right globus pallidus, PUT\_L: left putamen, PUT\_R: right putamen, TH\_L: left  
388 thalamus, TH\_R: right thalamus

389

390 The group-means of magnetic susceptibilities showed better reliability than pixel-based  
391 analyses as shown in Tables 3 and 4. Fig 6 shows comparisons of group-mean  
392 measurements of magnetic susceptibility. The results show good statistical equivalence  
393 in most structures when processed in transformed space or direct coregistration of  
394 QSMs.

395

396 **Table 3. Mean magnetic susceptibility (in the unit of ppm) comparison by paired**  
397 **T-test for coregistration of source GRE data to MPRAGE space before QSM**  
398 **processing.**

| Structure | mean $\chi_m$ (SD)<br>in GRE space | mean $\chi_m$ (SD)<br>in MPRAGE space | P-value (CI)              |
|-----------|------------------------------------|---------------------------------------|---------------------------|
| CN_L      | 0.0527 (0.02)                      | 0.0454 (0.0239)                       | 0.117 (-0.00234, 0.0168)  |
| CN_R      | 0.0448 (0.0155)                    | 0.0453 (0.0241)                       | 0.906 (-0.0108, 0.00975)  |
| GP_L      | 0.135 (0.0238)                     | 0.127 (0.0294)                        | 0.141 (-0.00362, 0.0206)  |
| GP_R      | 0.119 (0.039)                      | 0.108 (0.0447)                        | 0.147 (-0.00491, 0.0268)  |
| PUT_L     | 0.0519 (0.00817)                   | 0.0481 (0.0121)                       | 0.177 (-0.00217, 0.00976) |
| PUT_R     | 0.062 (0.0167)                     | 0.0557 (0.017)                        | < 0.05 (0.00213, 0.0105)  |
| TH_L      | -0.00625 (0.00787)                 | 0.00292 (0.0147)                      | 0.0758 (-0.0196, 0.00124) |
| TH_R      | -0.00489 (0.00992)                 | 0.00285 (0.0131)                      | 0.0775 (-0.0166, 0.00111) |

399

400  $\chi_m$ : magnetic susceptibility

401 SD: Standard deviation, CI: Confidence interval

402 CN\_L: left caudate nucleus, CN\_R: right caudate nucleus, GP\_L: left globus pallidus,

403 GP\_R: right globus pallidus, PUT\_L: left putamen, PUT\_R: right putamen, TH\_L: left

404 thalamus, TH\_R: right thalamus

405

406 **Table 4. Mean magnetic susceptibility (in the unit of ppm) comparison by paired**

407 **T-test for direct coregistration of QSM in GRE space to MPRAGE space.**

| structure | mean $\chi_m$ (SD)<br>in GRE space | mean $\chi_m$ (SD)<br>in MPRAGE space | P-value (CI)                  |
|-----------|------------------------------------|---------------------------------------|-------------------------------|
| CN_L      | 0.0527 (0.02)                      | 0.0526 (0.02)                         | 0.776 (-0.000201, 0.000258)   |
| CN_R      | 0.0448 (0.0155)                    | 0.0448 (0.0155)                       | 0.760 (-0.000189, 0.000145)   |
| GP_L      | 0.135 (0.0238)                     | 0.135 (0.0234)                        | 0.622 (-0.00077, 0.000495)    |
| GP_R      | 0.119 (0.039)                      | 0.119 (0.0394)                        | 0.722 (-0.00107, 0.00147)     |
| PUT_L     | 0.0519 (0.00817)                   | 0.0522 (0.00772)                      | 0.585 (-0.00132, 0.000809)    |
| PUT_R     | 0.062 (0.0167)                     | 0.0616 (0.0171)                       | 0.325 (-0.000465, 0.00122)    |
| TH_L      | -0.00625 (0.00787)                 | -0.00627 (0.00791)                    | 0.537 (-0.0000547, 0.0000961) |
| TH_R      | -0.00489 (0.00992)                 | -0.00492 (0.00991)                    | 0.480 (-0.0000733, 0.000141)  |

408  $\chi_m$ : magnetic susceptibility

409 SD: Standard deviation, CI: Confidence interval

410 CN\_L: left caudate nucleus, CN\_R: right caudate nucleus, GP\_L: left globus pallidus,

411 GP\_R: right globus pallidus, PUT\_L: left putamen, PUT\_R: right putamen, TH\_L: left

412 thalamus, TH\_R: right thalamus

413

414 **Fig 6. Comparison of group-mean magnetic susceptibilities acquired by two**  
415 **different coregistration approaches.**

416 (a) Comparison of QSM values in its native space (red) and in MPRAGE space (cyan)  
417 obtained by coregistration of source GRE data. Although differences are noticeable in  
418 group-mean susceptibility they are statistically significant except for one label (PUT\_R).

419 (b) QSM was robust to its direct coregistration to MPRAGE space in all structures. The  
420 group-mean susceptibilities were almost identical in GRE and MPRAGE spaces when  
421 QSM was directly coregistered. Therefore, coregistration of resultant QSM to a target  
422 space would be a better reproducible approach in most brain structures. (TH\_L: left  
423 thalamus, TH\_R: right thalamus, CN\_L: left caudate nucleus, CN\_R: right caudate  
424 nucleus, GP\_L: left globus pallidus, GP\_R: right globus pallidus, PUT\_L: left putamen,  
425 PUT\_R: right putamen)

426

427 The intra-class correlation coefficient (ICC) was conducted on the mean (intra-  
428 structure) measurement. For all pairs of measurements of  $R2^*$ , the estimated ICCs were  
429 higher than 0.9 as shown in Table 5. For magnetic susceptibility, ICCs were higher than  
430 0.9 between the measurements processed in GRE space and those directly

431 transformed to MPRAGE space. ICCs were between 0.75 and 0.9 in five out of eight  
 432 structures between the magnetic susceptibilities estimated in GRE space and the ones  
 433 in transformed space and three structures showed ICCs between 0.5 and 0.75 or lower  
 434 than 0.5.

435

436 **Table 5. Intraclass correlation (ICC) coefficients.**

| structure | R2* (GRE vs. MPRAGE) |         | R2* (GRE vs direct coreg.) |         | $\chi_m$ (GRE vs. MPRAGE) |         | $\chi_m$ (GRE vs direct coreg.) |         |
|-----------|----------------------|---------|----------------------------|---------|---------------------------|---------|---------------------------------|---------|
|           | ICC (CI)             | P_value | ICC (CI)                   | P_value | ICC (CI)                  | P_value | ICC (CI)                        | P_value |
| CN_L      | 1 (0.999, 1)         | <0.001  | 1 (0.999, 1)               | <0.001  | 0.834 (0.38, 0.964)       | <0.05   | 1 (1, 1)                        | <0.001  |
| CN_R      | 0.999 (0.996, 1)     | <0.001  | 0.999 (0.997, 1)           | <0.001  | 0.834 (0.357, 0.965)      | <0.05   | 1 (1, 1)                        | <0.001  |
| GP_L      | 0.999 (0.997, 1)     | <0.001  | 0.999 (0.998, 1)           | <0.001  | 0.826 (0.378, 0.962)      | <0.05   | 1 (0.998, 1)                    | <0.001  |
| GP_R      | 1 (0.999, 1)         | <0.001  | 1 (0.999, 1)               | <0.001  | 0.879 (0.523, 0.974)      | <0.001  | 0.999 (0.997, 1)                | <0.001  |
| PUT_L     | 0.999 (0.997, 1)     | <0.001  | 1 (0.998, 1)               | <0.001  | 0.734 (0.194, 0.939)      | <0.05   | 0.988 (0.945, 0.998)            | <0.001  |
| PUT_R     | 1 (0.999, 1)         | <0.001  | 1 (0.999, 1)               | <0.001  | 0.897 (0.146, 0.982)      | <0.05   | 0.998 (0.992, 1)                | <0.001  |
| TH_L      | 1 (0.998, 1)         | <0.001  | 1 (0.999, 1)               | <0.001  | 0.357 (-0.2, 0.807)       | 0.114   | 1 (1, 1)                        | <0.001  |
| TH_R      | 1 (1, 1)             | <0.001  | 1 (0.999, 1)               | <0.001  | 0.501 (-0.107, 0.867)     | 0.0536  | 1 (1, 1)                        | <0.001  |

437

438 R2\* is in the unit of Hz

439  $\chi_m$ : magnetic susceptibility in ppm

440 CI: confidence interval

441 CN\_L: left caudate nucleus, CN\_R: right caudate nucleus, GP\_L: left globus pallidus,

442 GP\_R: right globus pallidus, PUT\_L: left putamen, PUT\_R: right putamen, TH\_L: left

443 thalamus, TH\_R: right thalamus

444

## 445 **Impact of coregistration of source GRE on resultant QSM**

### 446 **Impact of interpolation**

447 Interpolation to different image resolution did not change magnitude or raw phase  
448 images visually as in Fig 7. While interpolated QSM after processing did not show  
449 significant differences (KS-test,  $D = 0.00175$ ,  $p > 0.05$ ) from the QSM in native space,  
450 QSM calculated from magnitude and phase images interpolated to different spatial  
451 resolution showed significant differences ( $D = 0.00992$ ,  $p < 0.001$ ) as in Fig 8.

452

453 **Fig 7. No significant impact of interpolation on raw images.**

454 Interpolation did not change the source image drastically: (a) magnitude image in GRE  
455 space ( $0.982 \times 0.982 \text{ mm}^2$ ), (b) phase image in GRE space, (c) magnitude image  
456 interpolated to MPRAGE space resolution ( $1 \times 1 \text{ mm}^2$  in plane resolution), (d) phase  
457 image interpolated to MPRAGE space resolution.

458

459 **Fig 8. Impact of two interpolation approaches on QSM.**

460 QSM directly interpolated was not significantly different from QSM processed in its  
461 native space (a) and (b). On the contrary, source GRE interpolation resulted in  
462 significantly different QSM distributions (c) and (d).

463

464 **Impact of coregistration on each step of QSM calculation chain**

465 Coregistration, which included not only interpolation but also angle changes  
466 between GRE and MPRAGE space, also did not cause significant statistical difference  
467 ( $D = 0.000639$ ,  $p = 0.977$ ) between raw phase distributions of GRE and interpolated  
468 GRE images (Fig 9 (a)). However, when they were unwrapped, distribution was ( $D =$   
469  $0.268$ ,  $p < 0.001$ ) significantly different (Fig 9 (b)). This difference was reflected on

470 frequency maps ( $D = 0.00659$ ,  $p < 0.001$ ) (Fig 9 (c)) and eventually caused significant  
471 difference ( $D = 0.0212$ ,  $p < 0.001$ ) between resultant QSMs. (Fig 9 (d)) QSM from  
472 source GRE coregistration was different than source GRE interpolation from the QSM in  
473 native space.

474

475 **Fig 9. Small error in source GRE coregistration propagates along the QSM**  
476 **processing chain.**

477 Although coregistration did not cause statistical differences in raw phase images (a),  
478 when it was unwrapped differences were distinguishable (b). This caused differences in  
479 frequency maps and eventually caused differences in QSM (d). Phase images of 4-th  
480 echo out of 5 echoes used to calculate the frequency map and QSM are shown here.

481

482

## 483 Discussion

### 484 Reliability of $R2^*$ and QSM at 7T

485 Our primary purpose was to evaluate the impact of linear coregistration methods  
486 on GRE-derived metrics ( $R2^*$  and QSM) acquired at 7T. Our results revealed that  $R2^*$   
487 was a reliable metric when processed in either native GRE space or non-native  
488 MPRAGE space, whereas magnetic susceptibility was not. The well-matched ECDFs  
489 indicate that neither linear coregistration of GRE data nor direct coregistration of  $R2^*$   
490 map to MPRAGE space alter the pixel values and distribution of  $R2^*$  metrics. On the  
491 contrary, ECDFs of QSM were only well matched for direct QSM registration to

492 MPRAGE space. This result implies that different approaches of coregistration may  
493 affect the pixel values and distribution of resultant QSM significantly in different manner.  
494 Therefore, QSM studies, in particular those employing pixel-based analysis, should be  
495 limited to susceptibility values if QSMs are calculated in native space.

496

## 497 **Difference between R2\* and QSM processing**

498         There are a number of possible reasons for the difference in the reliability of R2\*  
499 versus magnetic susceptibility found in this study. One source of this discrepancy may  
500 arise from the intrinsically different characteristics of calculations used for R2\* and  
501 QSM. R2\* is calculated only from the magnitude of GRE images, while QSM (V-SHARP  
502 and SFCR in this study) utilizes mainly the phase. R2\* calculated in a voxel-wise  
503 manner is an inherently local entity, while QSM reconstruction involves complicated  
504 dipole inversion that needs to take phase/frequency values in neighboring voxels into  
505 account. Since R2\* maps are calculated in a voxel-wise manner from magnitude  
506 components across echo-times (TEs), any small magnitude difference within a voxel  
507 stay local without propagation to other voxels. On the contrary, phase components are  
508 determined by susceptibility sources not only within a voxel but also in surrounding and  
509 remote voxels. Elkady et al.'s work demonstrated the requirement of an extended field-  
510 of-view (5-fold) to minimize errors in QSM reconstruction of selected anatomical  
511 structure. [23] From a different perspective, their work also suggests that any alteration  
512 in QSM PV of a certain voxel could be caused by alterations in PVs of GRE  
513 phase/frequency within surrounding or remote voxels even though the PV of  
514 phase/frequency does not change in that voxel itself. This suspicion was to some extent



515 confirmed in that alteration patterns in PVs of frequency maps did not result in similar  
516 alteration patterns in QSM PVs.

517  
518 Another source of the discrepancy between our findings for  $R2^*$  and QSM could be the  
519 multiple-step nature of the QSM processing used in this study (phase unwrapping,  
520 background phase removal, and dipole inversion, [24-26]), which may amplify the small  
521 differences induced by coregistration. In order to minimize such error prorogations in  
522 QSM processing, recently proposed single-step QSM methods would be preferred in  
523 future studies. [27-29]

524  
525 In our study, to ensure equivalent brain masks were used in both the native GRE  
526 space and the MPRAGE spaces for background removal and QSM calculation, we used  
527 the brain mask acquired in its native space, then, applied the GRE-to-MPRAGE  
528 transformation matrix for the QSM reconstruction in the transformed space. However, if  
529 the coregistration is not perfect with small discrepancies in the brain masks over the two  
530 spaces, it could lead to differences in the estimated local frequency map during the  
531 background field removal step (as in Figure 4) and further lead to discrepancies in the  
532 final QSMs through the complicated dipole inversion step. Though the ill-posedness in  
533 QSM dipole inversion [30, 31] could be overcome by applying the calculation of  
534 susceptibility using multiple-orientation sampling (COSMOS), [32] only single orientation  
535 data was acquired for the present study, and we had to use single-orientation QSM  
536 method with regularization.

537

## 538 **Difference in two coregistration approaches**

539           There is an intrinsic difference between our two coregistration approaches with  
540 previous works on reliability or reproducibility of  $R2^*$  and QSM [1-4]. Previous works  
541 compared two data of an identical image resolution. However, our reliability test was  
542 performed for data sets of close but different image resolutions. From this perspective,  
543  $R2^*$  calculation was not affected when it was processed with either native resolution or  
544 non-native resolution. This indicates that a slight alteration of image resolution in a  
545 transformed space does not affect resulting PVs or their distribution in  $R2^*$  maps. On  
546 the contrary, a similar reliability was not confirmed for QSM reconstruction in our study.

547  
548           Previous studies have shown that direct coregistration of QSM was reliable for  
549 various transformations including intra-individual coregistration [3] and spatial  
550 normalization to MNI space. [1] Our study adds to this body of literature by providing  
551 evidence of discrepancies introduced by processing QSM in a non-native space.  
552 Collectively, these results suggest that QSM must be processed before coregistration of  
553 its source GRE image to another image space. On the other hand, our results showed  
554 statistical invariance of  $R2^*$  metrics after the coregistration of GRE images at both pixel  
555 and group levels. In these reliability tests, the agreement of  $R2^*$  measurements before  
556 and after coregistration suggest that  $R2^*$  maps may serve as robust measurements  
557 regardless of the timing of coregistration.

558  
559           In contrast to the robustness of  $R2^*$  metric to different coregistration approaches  
560 at both pixel- and ROI-levels, differences observed in pixel-based analyses of QSM

561 measures were not statistically significant in ROI-based analyses when QSM was  
562 processed in the transformed space. This is presumably due to the fact that individual  
563 differences at the pixel level were averaged out for the ROIs. Although group mean  
564 values of susceptibilities of most structures were statistically identical, noticeably bigger  
565 differences were observed when QSM was processed in the transformed space as  
566 compared to directly coregistered QSM values consistent with the pixel-value based  
567 analysis. This result also suggests that ROI-based analysis and pixel-based analysis of  
568 QSM may lead to contradictory conclusions – especially when QSM was derived from  
569 transformed GRE data instead of its native space.

570

571 In addition, paired-t-test (for the paired  $\chi_m$  mean of means) and ICC (for grouped  
572 intra-structure means of  $\chi_m$ ) showed unreliability in different structures. This indicates  
573 that a chosen statistical analysis approach may also affect the interpretation of a study  
574 for group comparison when QSM is processed in a non-native space.

575

## 576 **Impact of interpolation and coregistration**

577 As an essential process in any coregistration, interpolation appeared to be a key  
578 factor affecting the QSM result in a non-native space. It is closely related to what source  
579 phase values are fed into the dipole inversion processing chain. Because of the ill-  
580 posed nature of dipole inversion, slightly different source values as well as voxel counts  
581 caused by altered voxel dimensions may lead to evidently different QSM after a long  
582 chain calculation pipeline. Our results clearly showed how slightly different voxel  
583 dimension of a source image could lead to distinguishable differences in resultant QSM.

584 Furthermore, these results suggest when large-scale cross-site data sets are compared,  
585 it is critical to keep the image parameters as close as possible with extra care on source  
586 image resolution in voxel based analyses.

587

## 588 **Limitations**

589         There are a few limitations in our study. Although our results showed excellent  
590 statistical invariance of  $R2^*$  to the linear coregistration of its source GRE image at the  
591 pixel and group levels, the reliability of  $R2^*$  for a non-linear transformation of the source  
592 GRE images was not tested. Hence, our finding has to be limited to linear  
593 coregistration. The robustness of statistical inference derived from  $R2^*$  maps and QSMs  
594 was not verified yet, and it is beyond the scope of this study. Our future work will include  
595 the reliability of statistical relationships between quantitative metrics and clinical  
596 measures under a similar coregistration of GRE images in a larger cohort including  
597 control and patient groups. Further, our data were single-orientation QSM's. Therefore,  
598 we could not verify if our results would apply for multi-orientation QSM, such as  
599 COSMOS.[32] However, it has to be noticed that multi-orientation QSM increases total  
600 scan time and, hence, is often impractical in a clinical study. [25] Furthermore, in our  
601 study, QSM calibration to a reference region was not performed. Although QSM  
602 calibration is being employed in recent QSM studies, there is no agreed reference  
603 region for this referencing purpose.[1, 33-36] CSF has frequently been used for the  
604 reference region in many studies.[33, 34] However, other regions have also been used.  
605 [35] Some studies did not perform QSM calibration at all. [1, 36] There have also been  
606 efforts to find suitable reference tissues for QSM. [35, 37] However, the selection of

607 reference region can be problematic when the region includes pathologic tissues.  
608 Because we focused on the assessment of  $R2^*$  maps and QSM before and after the  
609 source GRE image coregistration in the context of reliability or reproducibility instead of  
610 the accuracy of the metrics, analysis without QSM calibration to a reference region  
611 should not undermine our study results. We did not conduct further analyses on  
612 unwrapping, background removal and QSM reconstruction algorithms because it is  
613 beyond the scope of our study.

614

615

## 616 **Conclusions**

617 To the best of our knowledge, the current study is the first report providing  
618 quantitative analysis of the influence of source GRE image transformation on the  
619 resultant parametric maps,  $R2^*$  map and QSM in particular. Our study is in line with and  
620 support prior reliability studies, but is distinguished from other work in that coregistration  
621 was performed for not only resultant parametric maps but also source GRE images  
622 providing complementary data which have not been explored before. In conclusion,  $R2^*$   
623 maps are reliable when processed from GRE data linearly transformed to a non-native  
624 space, whereas QSM is not. Hence, caution is advised when using QSM in a multi-  
625 modal MRI study, and it is strongly recommended to process QSM in its native space  
626 prior to any coregistrations.

627

## 628 **Acknowledgment**

629           The support of many team members makes work like this possible. We would  
630 like to acknowledge the support of the staff of the F.M. Kirby Center, including MRI  
631 technologists Terri Brawner, Kathleen Kahl, and Ivana Kusevic and the Center's  
632 director, Dr. Peter van Zijl. We would also like to acknowledge the support of study  
633 coordinators Ms. Julie Fiol and Kerry Naunton.

634

635

## 636 **References**

- 637 1.       Hinoda T, Fushimi Y, Okada T, Fujimoto K, Liu C, Yamamoto A, et al.  
638 Quantitative Susceptibility Mapping at 3 T and 1.5 T: Evaluation of Consistency and  
639 Reproducibility. *Invest Radiol.* 2015;50(8):522-30. doi:  
640 10.1097/RLI.0000000000000159. PubMed PMID: 25900085.
- 641 2.       Deh K, Nguyen TD, Eskreis-Winkler S, Prince MR, Spincemaille P, Gauthier S, et  
642 al. Reproducibility of quantitative susceptibility mapping in the brain at two field  
643 strengths from two vendors. *Journal of magnetic resonance imaging : JMRI.*  
644 2015;42(6):1592-600. doi: 10.1002/jmri.24943. PubMed PMID: 25960320; PubMed  
645 Central PMCID: PMC4661140.
- 646 3.       Santin MD, Didier M, Valabregue R, Yahia Cherif L, Garcia-Lorenzo D, Loureiro  
647 de Sousa P, et al. Reproducibility of R2 \* and quantitative susceptibility mapping (QSM)  
648 reconstruction methods in the basal ganglia of healthy subjects. *NMR Biomed.*  
649 2017;30(4). doi: 10.1002/nbm.3491. PubMed PMID: 26913373.

- 650 4. Lauzon ML, McCreary CR, McLean DA, Salluzzi M, Frayne R. Quantitative  
651 susceptibility mapping at 3 T: comparison of acquisition methodologies. *NMR Biomed.*  
652 2017;30(4). Epub 2016/02/19. doi: 10.1002/nbm.3492. PubMed PMID: 26887659.
- 653 5. Lancione M, Tosetti M, Cecchi P, Donatelli G, Cosottini M, Costagli M, editors.  
654 Quantitative Susceptibility Mapping at high and ultra-high field: a reproducibility study.  
655 Proceedings of International Society for Magnetic Resonance in Medicine; 2018; Paris,  
656 France.
- 657 6. Rua C, Clarke WT, Driver ID, Mouglin O, Clare S, Francis S, et al., editors.  
658 Reproducibility of Quantitative Susceptibility Mapping and R2\* Mapping of the Human  
659 Brain at 7T: a Multi-Centre Pilot Study. Proceedings of International Society for  
660 Magnetic Resonance in Medicine; 2018; Paris, France.
- 661 7. Okada T, Fujimoto K, Urushibata Y, Kuribayashi H, Kober T, Isa T, editors.  
662 Cortical T2\* and QSM maps at 7T: test-retest reproducibility, similarity and differences.  
663 Proceedings of International Society of Magnetic Resonance in Medicine; 2018; Paris,  
664 France.
- 665 8. Halchenko YO, Hanke M. Open is Not Enough. Let's Take the Next Step: An  
666 Integrated, Community-Driven Computing Platform for Neuroscience. *Frontiers in*  
667 *neuroinformatics.* 2012;6:22. doi: 10.3389/fninf.2012.00022. PubMed PMID: 23055966;  
668 PubMed Central PMCID: PMC3458431.
- 669 9. Gorgolewski K, Burns CD, Madison C, Clark D, Halchenko YO, Waskom ML, et  
670 al. Nipype: a flexible, lightweight and extensible neuroimaging data processing  
671 framework in python. *Frontiers in neuroinformatics.* 2011;5:13. doi:

- 672 10.3389/fninf.2011.00013. PubMed PMID: 21897815; PubMed Central PMCID:  
673 PMCPMC3159964.
- 674 10. Tustison NJ, Avants BB, Cook PA, Zheng YJ, Egan A, Yushkevich PA, et al.  
675 N4ITK: Improved N3 Bias Correction. IEEE transactions on medical imaging.  
676 2010;29(6):1310-20. doi: 10.1109/Tmi.2010.2046908. PubMed PMID:  
677 WOS:000278535800009.
- 678 11. Jenkinson M, Smith S. A global optimisation method for robust affine registration  
679 of brain images. Medical image analysis. 2001;5(2):143-56. doi: Doi 10.1016/S1361-  
680 8415(01)00036-6. PubMed PMID: WOS:000169672400005.
- 681 12. Jenkinson M, Bannister P, Brady M, Smith S. Improved optimization for the  
682 robust and accurate linear registration and motion correction of brain images.  
683 NeuroImage. 2002;17(2):825-41. doi: 10.1006/nimg.2002.1132. PubMed PMID:  
684 WOS:000178642000027.
- 685 13. Miller AJ, Joseph PM. The Use of Power Images to Perform Quantitative-  
686 Analysis on Low Snr Mr-Images. Magnetic resonance imaging. 1993;11(7):1051-6. doi:  
687 Doi 10.1016/0730-725x(93)90225-3. PubMed PMID: WOS:A1993MB03400017.
- 688 14. Reichenbach JR, Schweser F, Serres B, Deistung A. Quantitative Susceptibility  
689 Mapping: Concepts and Applications. Clin Neuroradiol. 2015;25:225-30. doi:  
690 10.1007/s00062-015-0432-9. PubMed PMID: WOS:000361820200026.
- 691 15. Wharton S, Bowtell R. Fiber orientation-dependent white matter contrast in  
692 gradient echo MRI. Proceedings of the National Academy of Sciences of the United  
693 States of America. 2012;109(45):18559-64. doi: 10.1073/pnas.1211075109. PubMed  
694 PMID: WOS:000311156700069.



- 695 16. Sati P, van Gelderen P, Silva AC, Reich DS, Merkle H, de Zwart JA, et al. Micro-  
696 compartment specific  $T^*(2)$  relaxation in the brain. *NeuroImage*. 2013;77:268-78. doi:  
697 10.1016/j.neuroimage.2013.03.005. PubMed PMID: WOS:000320073900027.
- 698 17. Li W, Wu B, Liu C. Quantitative susceptibility mapping of human brain reflects  
699 spatial variation in tissue composition. *NeuroImage*. 2011;55(4):1645-56. doi:  
700 10.1016/j.neuroimage.2010.11.088. PubMed PMID: 21224002; PubMed Central  
701 PMCID: PMC3062654.
- 702 18. Schweser F, Deistung A, Lehr BW, Reichenbach JR. Quantitative imaging of  
703 intrinsic magnetic tissue properties using MRI signal phase: An approach to in vivo brain  
704 iron metabolism? *NeuroImage*. 2011;54(4):2789-807. doi:  
705 10.1016/j.neuroimage.2010.10.070. PubMed PMID: WOS:000286495800024.
- 706 19. Wu B, Li W, Guidon A, Liu CL. Whole brain susceptibility mapping using  
707 compressed sensing. *Magnet Reson Med*. 2012;67(1):137-47. doi: 10.1002/mrm.23000.  
708 PubMed PMID: WOS:000298482800016.
- 709 20. Li W, Avram AV, Wu B, Xiao X, Liu CL. Integrated Laplacian-based phase  
710 unwrapping and background phase removal for quantitative susceptibility mapping. *Nmr*  
711 *in Biomedicine*. 2014;27(2):219-27. doi: 10.1002/nbm.3056. PubMed PMID:  
712 WOS:000329986900012.
- 713 21. Bao L, Li X, Cai C, Chen Z, van Zijl PC. Quantitative Susceptibility Mapping  
714 Using Structural Feature Based Collaborative Reconstruction (SFCR) in the Human  
715 Brain. *IEEE transactions on medical imaging*. 2016;35(9):2040-50. doi:  
716 10.1109/TMI.2016.2544958. PubMed PMID: 27019480; PubMed Central PMCID:  
717 PMCPMC5495149.

- 718 22. Jenkinson M, Beckmann CF, Behrens TE, Woolrich MW, Smith SM. Fsl.  
719 NeuroImage. 2012;62(2):782-90. doi: 10.1016/j.neuroimage.2011.09.015. PubMed  
720 PMID: WOS:000306390600032.
- 721 23. Elkady AM, Sun H, Wilman AH. Importance of extended spatial coverage for  
722 quantitative susceptibility mapping of iron-rich deep gray matter. Magnetic resonance  
723 imaging. 2016;34(4):574-8. doi: 10.1016/j.mri.2015.12.032. PubMed PMID: 26721523.
- 724 24. Haacke EM, Liu S, Buch S, Zheng W, Wu D, Ye Y. Quantitative susceptibility  
725 mapping: current status and future directions. Magnetic resonance imaging.  
726 2015;33(1):1-25. doi: 10.1016/j.mri.2014.09.004. PubMed PMID: 25267705.
- 727 25. Liu C, Wei H, Gong NJ, Cronin M, Dibb R, Decker K. Quantitative Susceptibility  
728 Mapping: Contrast Mechanisms and Clinical Applications. Tomography. 2015;1(1):3-17.  
729 doi: 10.18383/j.tom.2015.00136. PubMed PMID: 26844301; PubMed Central PMCID:  
730 PMCPMC4734903.
- 731 26. Schweser F, Deistung A, Reichenbach JR. Foundations of MRI phase imaging  
732 and processing for Quantitative Susceptibility Mapping (QSM). Z Med Phys.  
733 2016;26(1):6-34. doi: 10.1016/j.zemedi.2015.10.002. PubMed PMID: 26702760.
- 734 27. Langkammer C, Bredies K, Poser BA, Barth M, Reishofer G, Fan AP, et al. Fast  
735 quantitative susceptibility mapping using 3D EPI and total generalized variation.  
736 NeuroImage. 2015;111:622-30. Epub 2015/03/04. doi:  
737 10.1016/j.neuroimage.2015.02.041. PubMed PMID: 25731991.
- 738 28. Liu Z, Kee Y, Zhou D, Wang Y, Spincemaille P. Preconditioned total field  
739 inversion (TFI) method for quantitative susceptibility mapping. Magn Reson Med.

- 740 2017;78(1):303-15. Epub 2016/07/29. doi: 10.1002/mrm.26331. PubMed PMID:  
741 27464893; PubMed Central PMCID: PMC5274595.
- 742 29. Chatnuntawech I, McDaniel P, Cauley SF, Gagoski BA, Langkammer C, Martin  
743 A, et al. Single-step quantitative susceptibility mapping with variational penalties. *NMR*  
744 *Biomed.* 2017;30(4). Epub 2016/06/23. doi: 10.1002/nbm.3570. PubMed PMID:  
745 27332141; PubMed Central PMCID: PMC5179325.
- 746 30. Wang Y, Liu T. Quantitative susceptibility mapping (QSM): Decoding MRI data  
747 for a tissue magnetic biomarker. *Magn Reson Med.* 2015;73(1):82-101. doi:  
748 10.1002/mrm.25358. PubMed PMID: 25044035; PubMed Central PMCID:  
749 PMC4297605.
- 750 31. Deistung A, Schweser F, Reichenbach JR. Overview of quantitative susceptibility  
751 mapping. *NMR Biomed.* 2017;30(4). doi: 10.1002/nbm.3569. PubMed PMID: 27434134.
- 752 32. Liu T, Spincemaille P, de Rochefort L, Kressler B, Wang Y. Calculation of  
753 susceptibility through multiple orientation sampling (COSMOS): a method for  
754 conditioning the inverse problem from measured magnetic field map to susceptibility  
755 source image in MRI. *Magn Reson Med.* 2009;61(1):196-204. doi: 10.1002/mrm.21828.  
756 PubMed PMID: 19097205.
- 757 33. Bilgic B, Pfefferbaum A, Rohlfing T, Sullivan EV, Adalsteinsson E. MRI estimates  
758 of brain iron concentration in normal aging using quantitative susceptibility mapping.  
759 *NeuroImage.* 2012;59(3):2625-35. doi: 10.1016/j.neuroimage.2011.08.077. PubMed  
760 PMID: 21925274; PubMed Central PMCID: PMC3254708.
- 761 34. Li X, Harrison DM, Liu H, Jones CK, Oh J, Calabresi PA, et al. Magnetic  
762 susceptibility contrast variations in multiple sclerosis lesions. *Journal of magnetic*

- 763 resonance imaging : JMRI. 2016;43(2):463-73. doi: 10.1002/jmri.24976. PubMed PMID:  
764 26073973; PubMed Central PMCID: PMC4678033.
- 765 35. Deistung A, Schafer A, Schweser F, Biedermann U, Turner R, Reichenbach JR.  
766 Toward in vivo histology: a comparison of quantitative susceptibility mapping (QSM)  
767 with magnitude-, phase-, and R2\*-imaging at ultra-high magnetic field strength.  
768 NeuroImage. 2013;65:299-314. doi: 10.1016/j.neuroimage.2012.09.055. PubMed PMID:  
769 23036448.
- 770 36. Schmalbrock P, Prakash RS, Schirda B, Janssen A, Yang GK, Russell M, et al.  
771 Basal Ganglia Iron in Patients with Multiple Sclerosis Measured with 7T Quantitative  
772 Susceptibility Mapping Correlates with Inhibitory Control. AJNR American journal of  
773 neuroradiology. 2016;37(3):439-46. doi: 10.3174/ajnr.A4599. PubMed PMID: 26611996.
- 774 37. Straub S, Schneider TM, Emmerich J, Freitag MT, Ziener CH, Schlemmer HP, et  
775 al. Suitable reference tissues for quantitative susceptibility mapping of the brain. Magn  
776 Reson Med. 2016. doi: 10.1002/mrm.26369. PubMed PMID: 27529579.

777

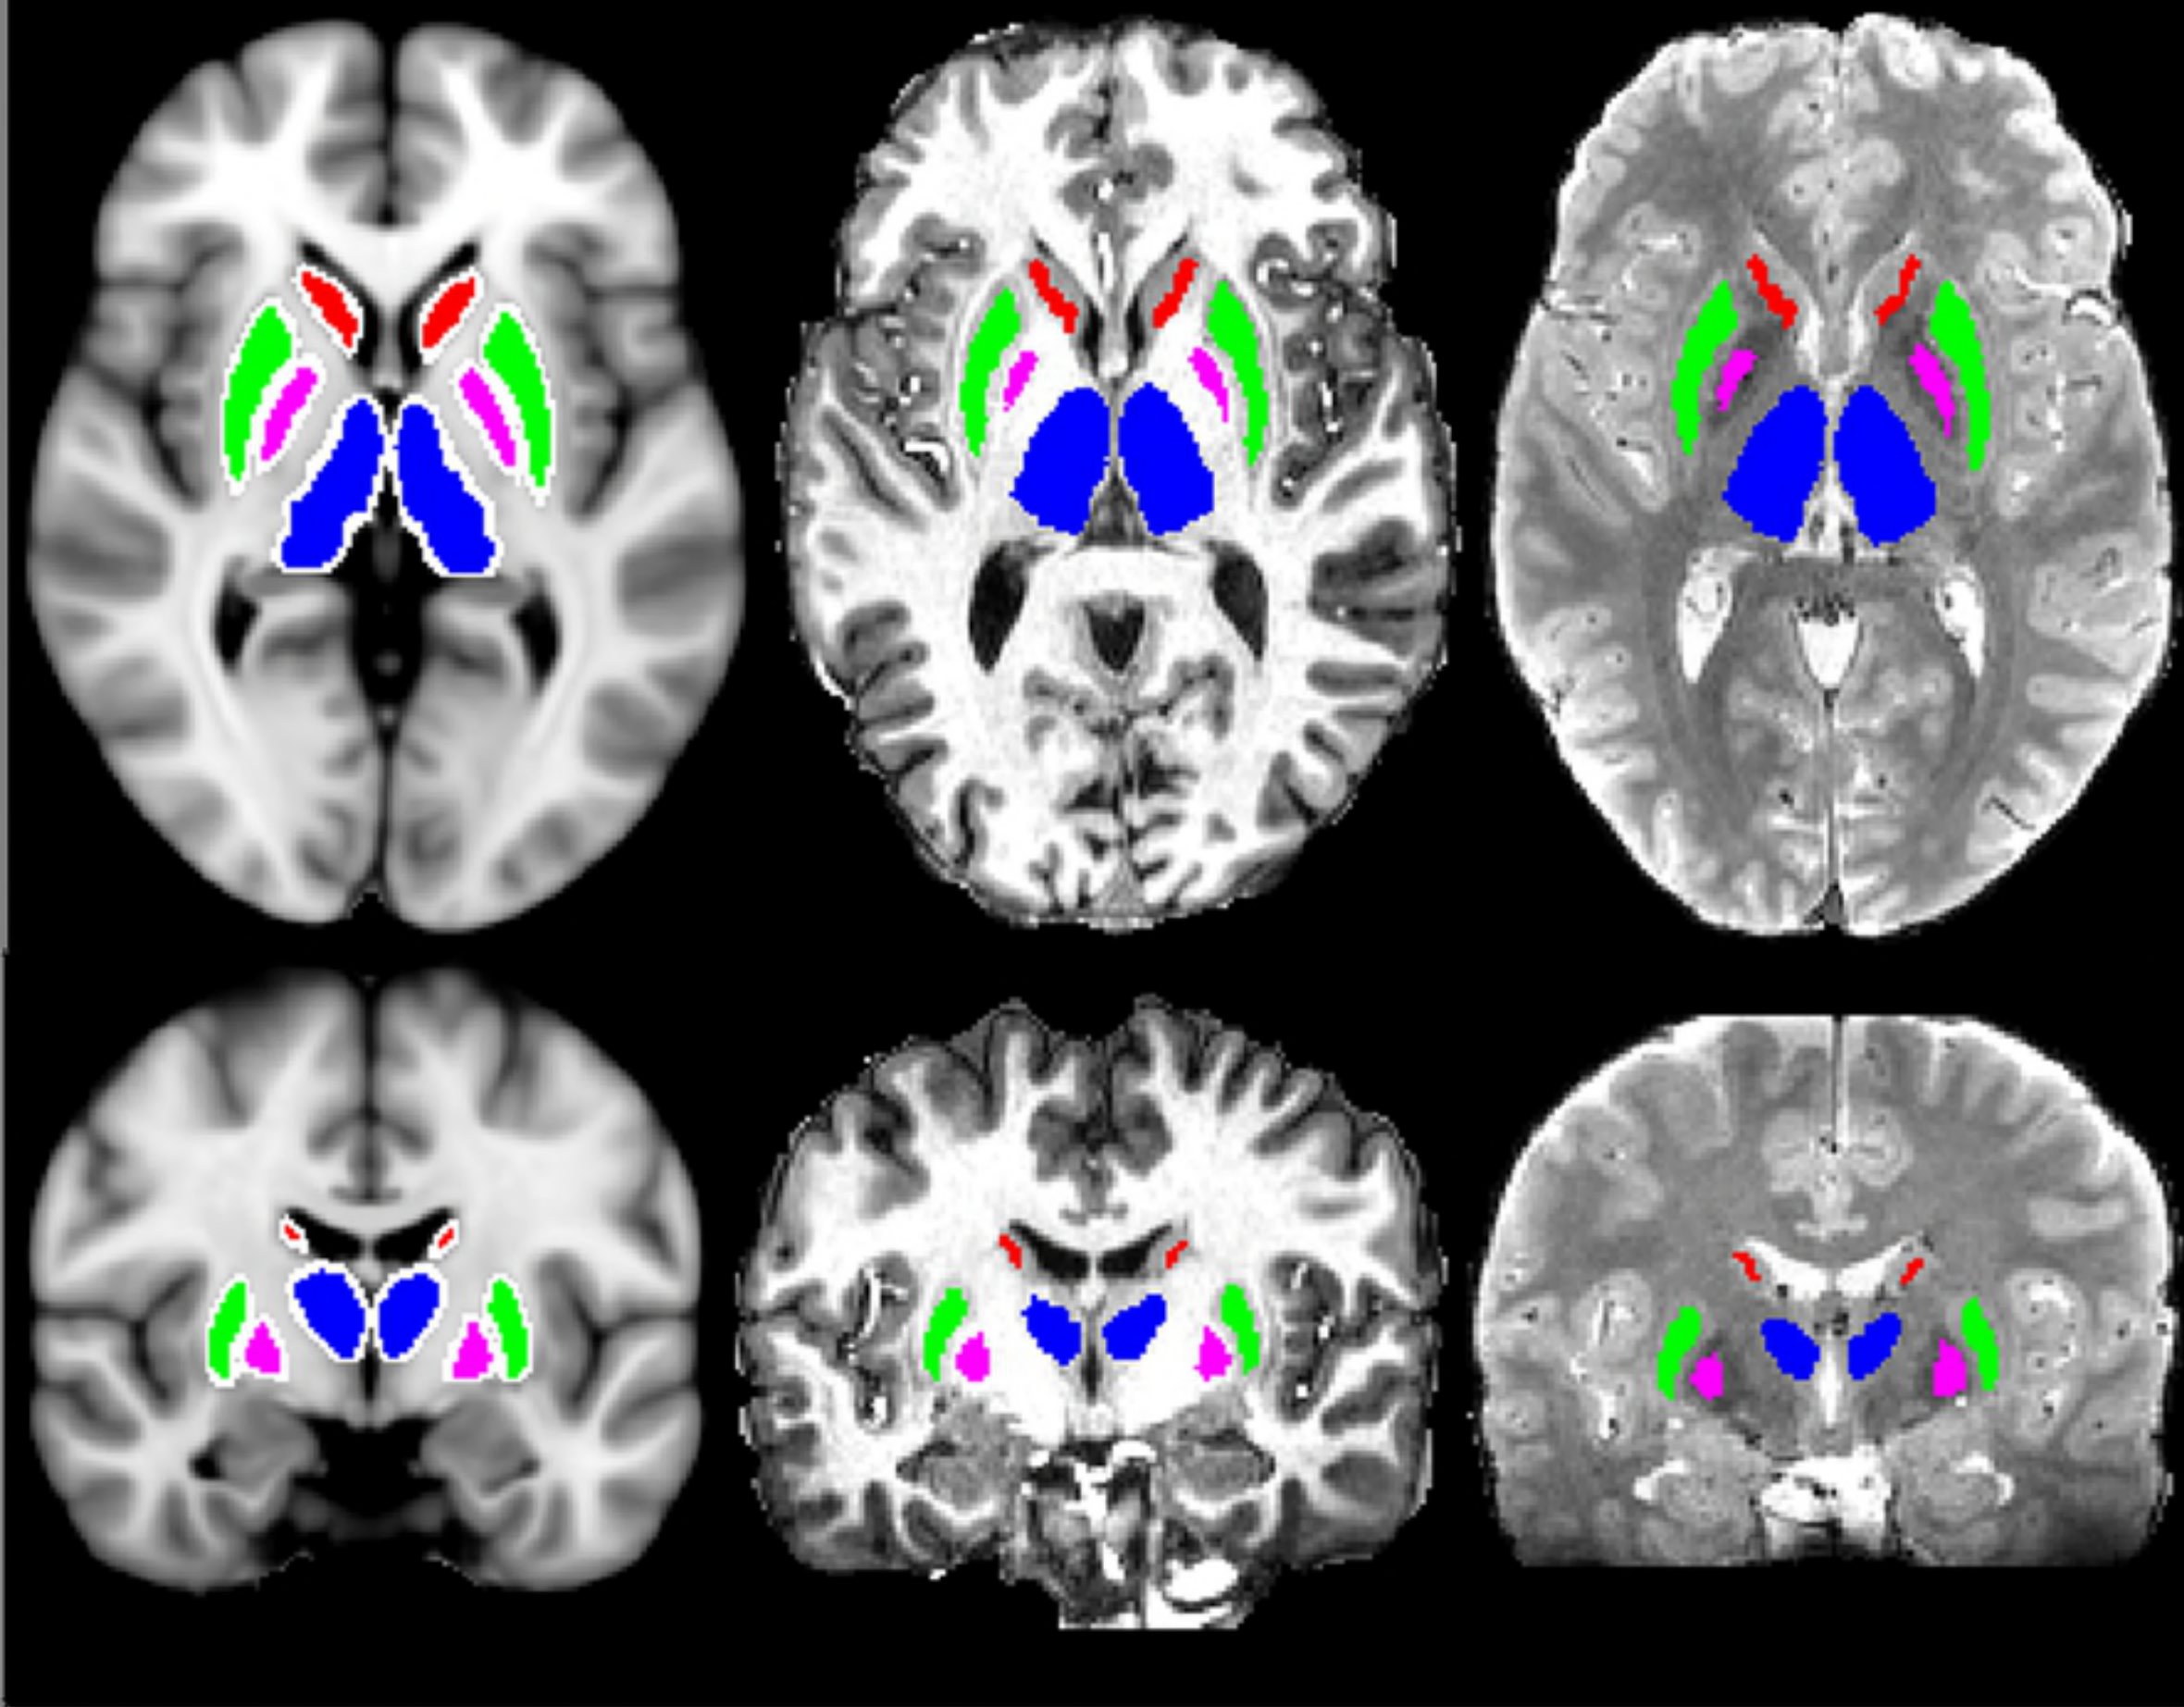

Fig1

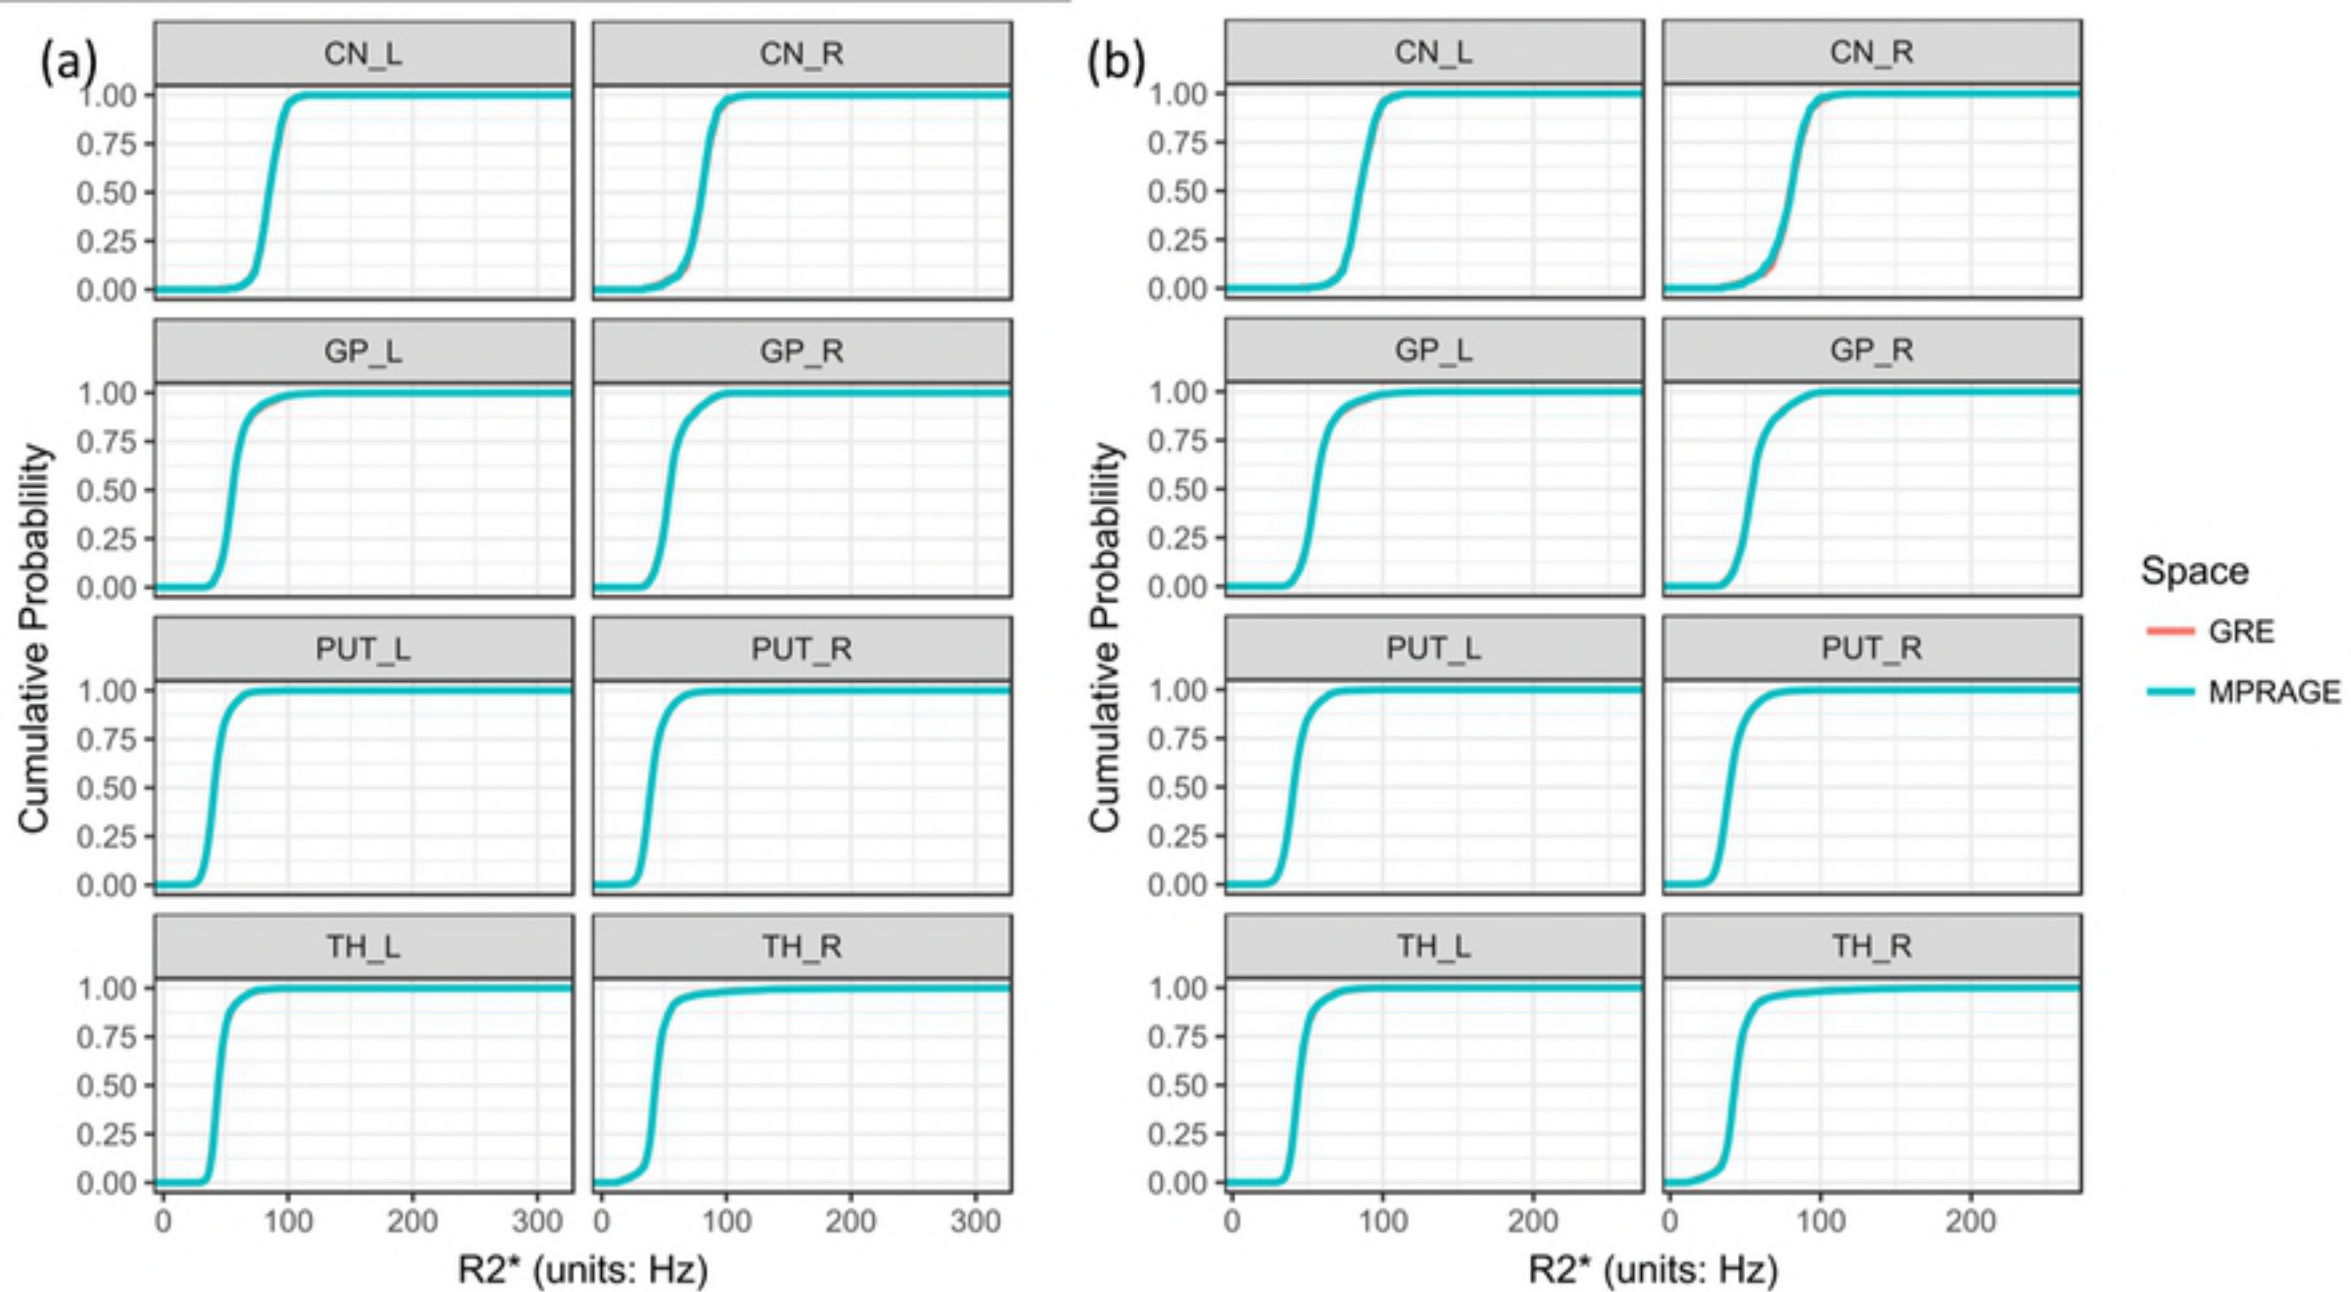

Fig2

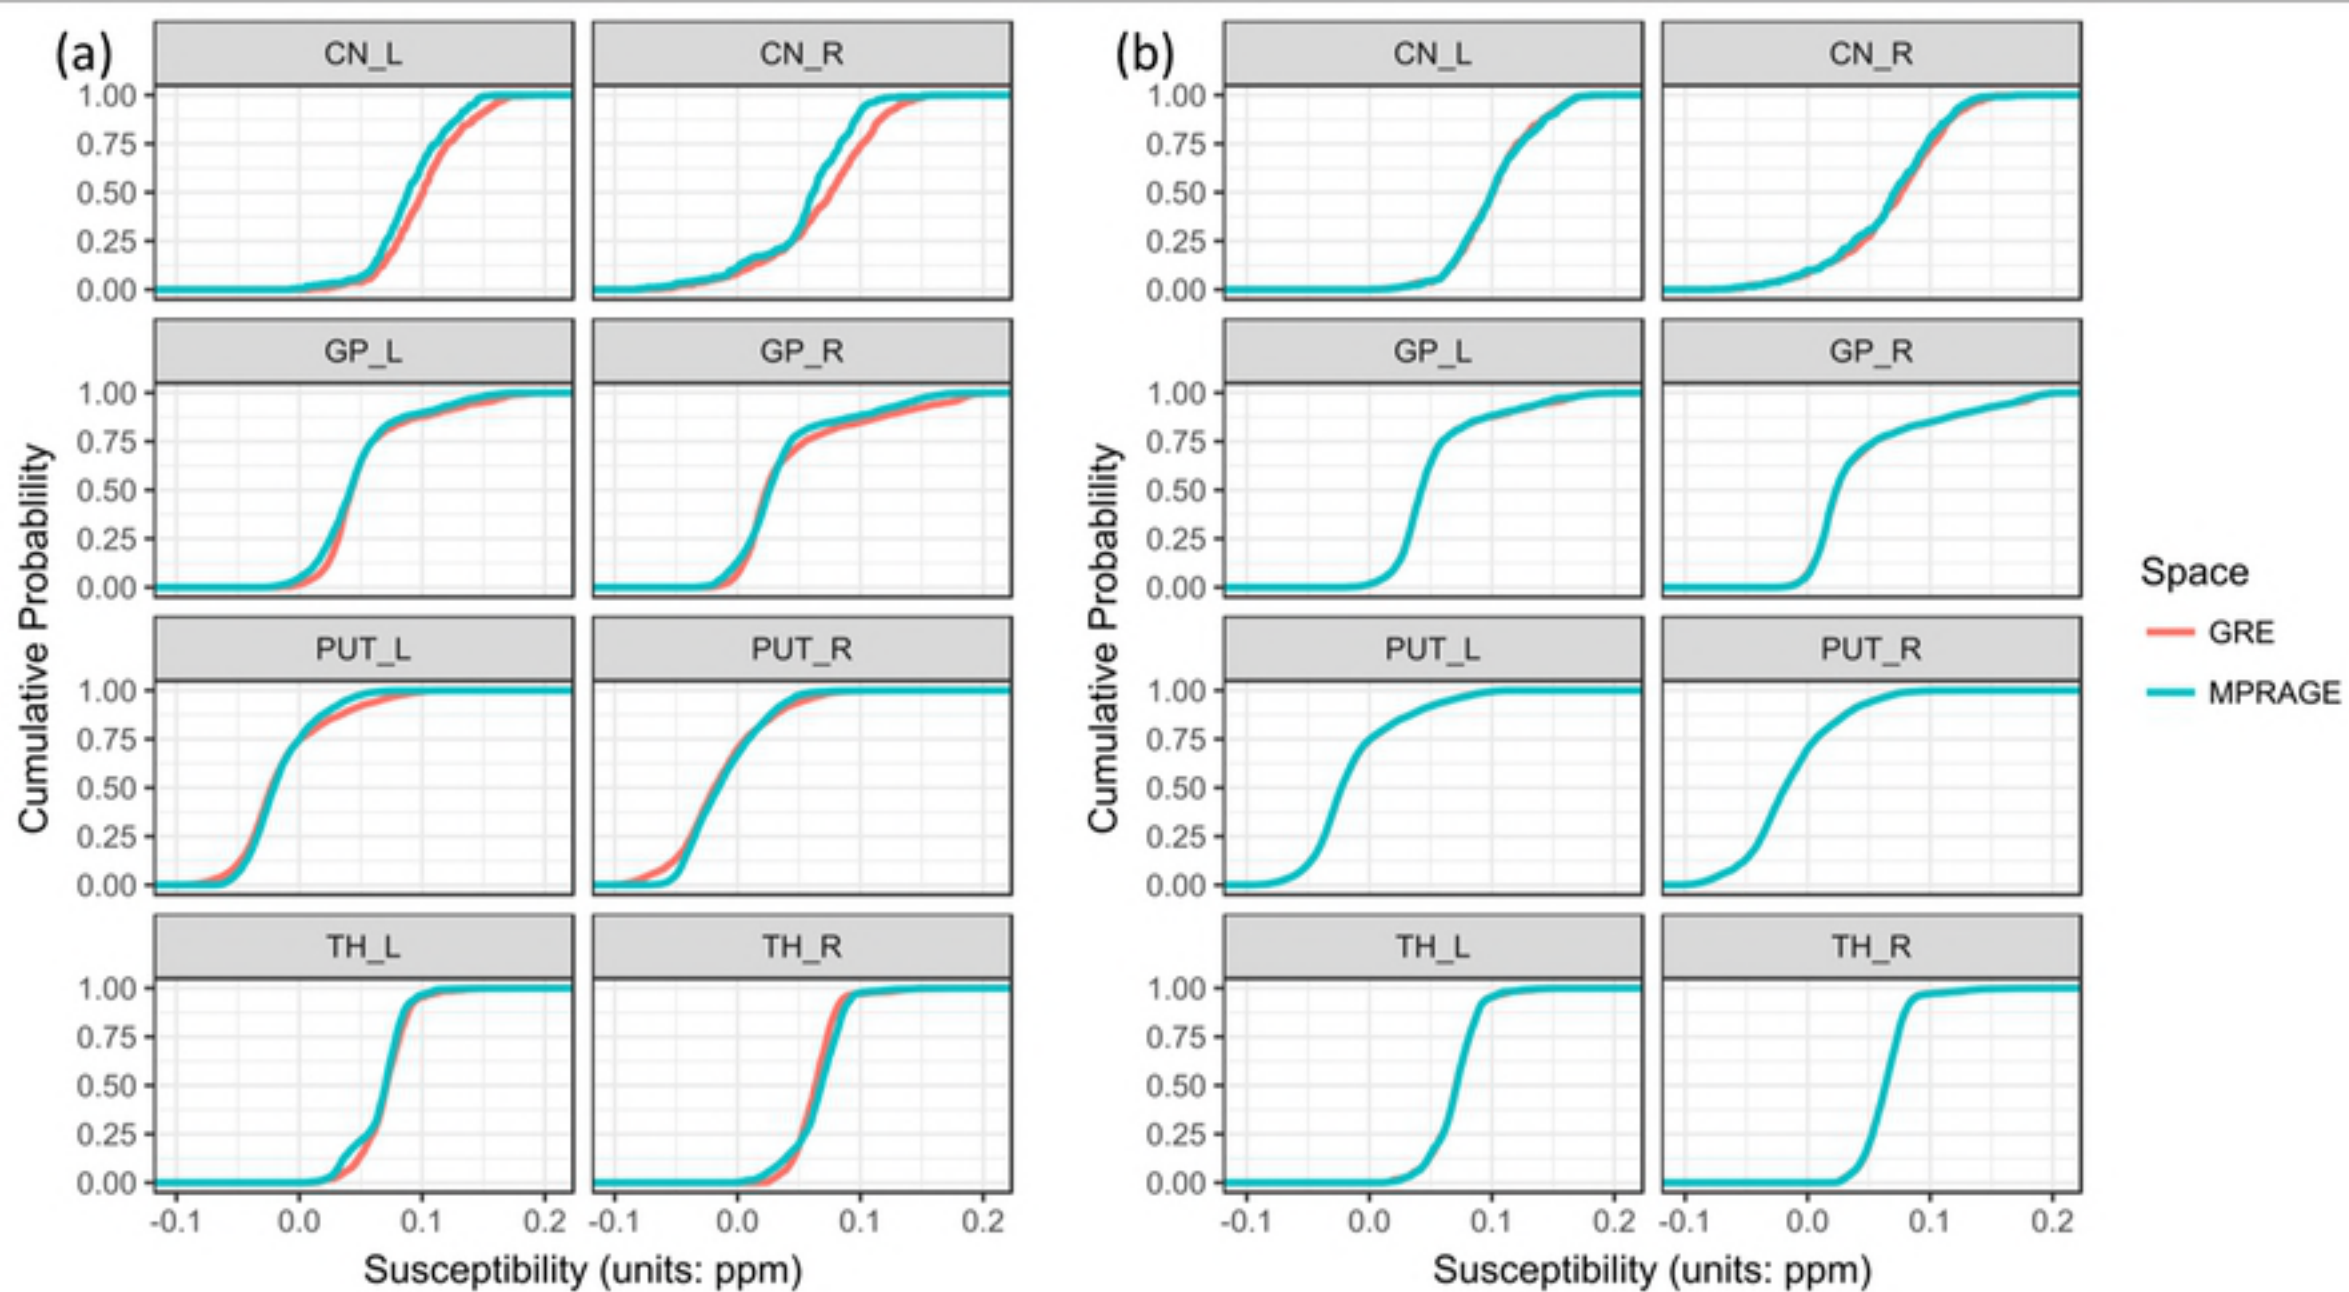

Fig3

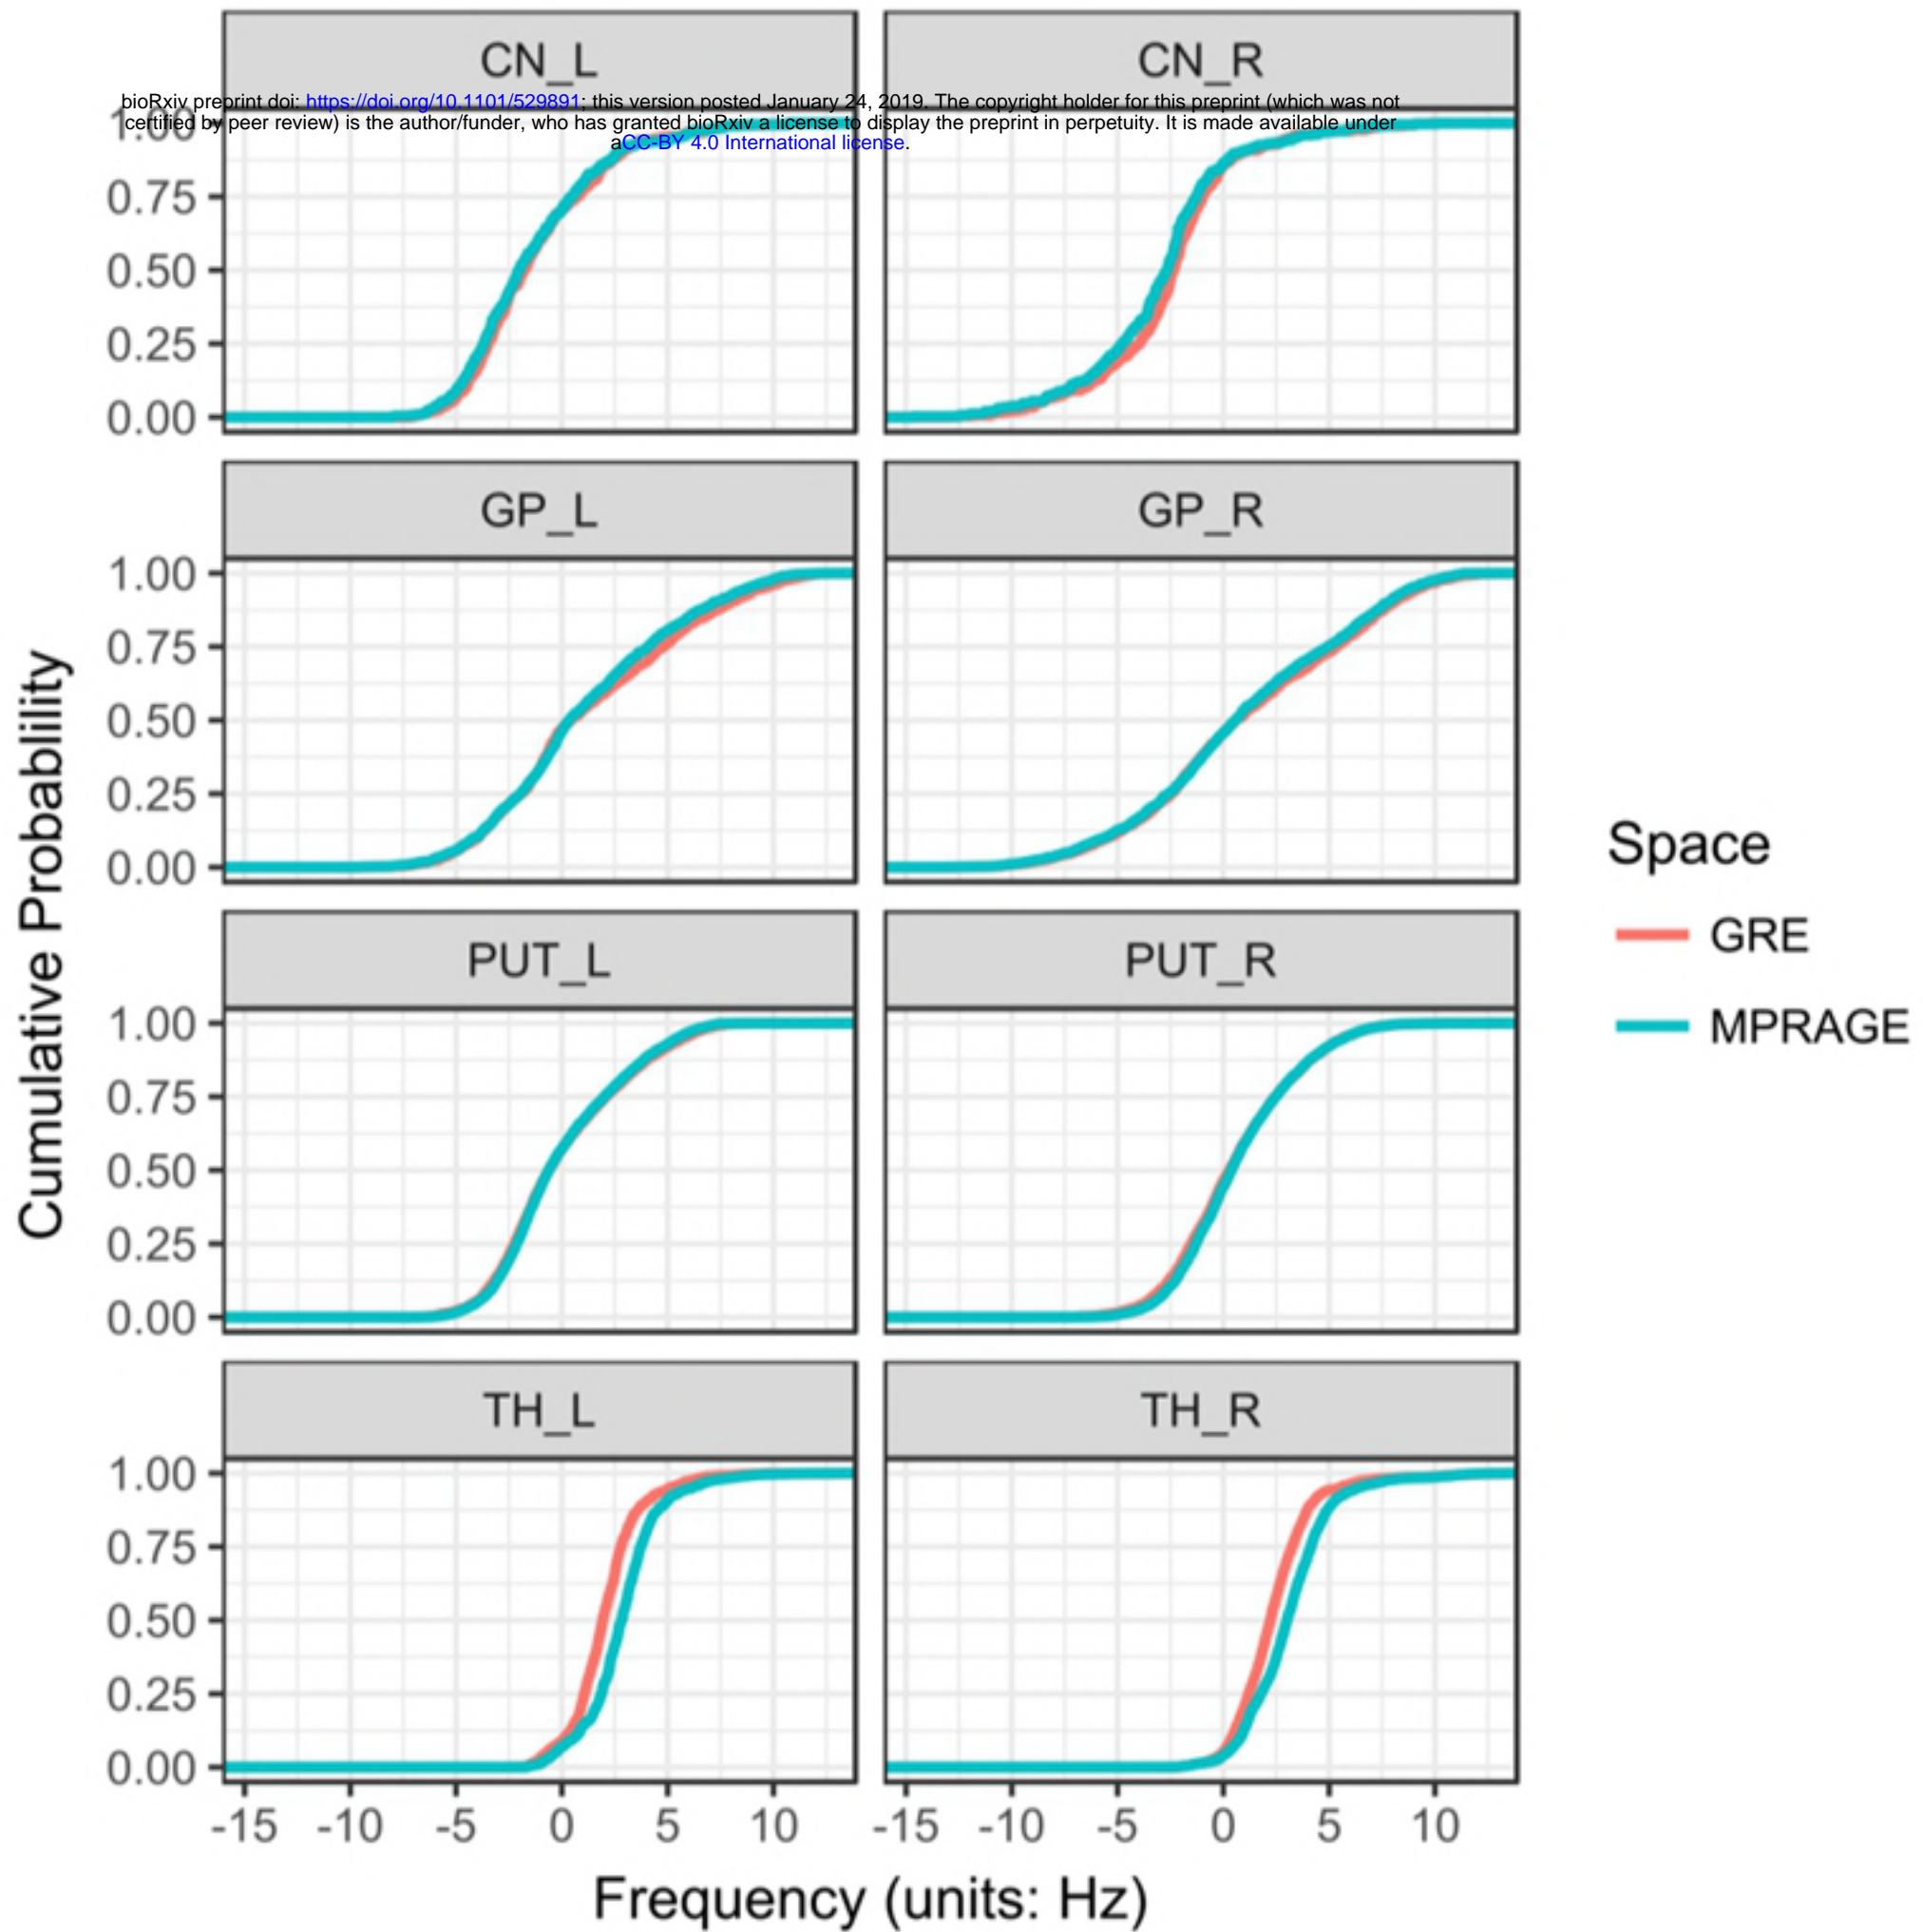

Fig4



(a) Source GRE Coregistration

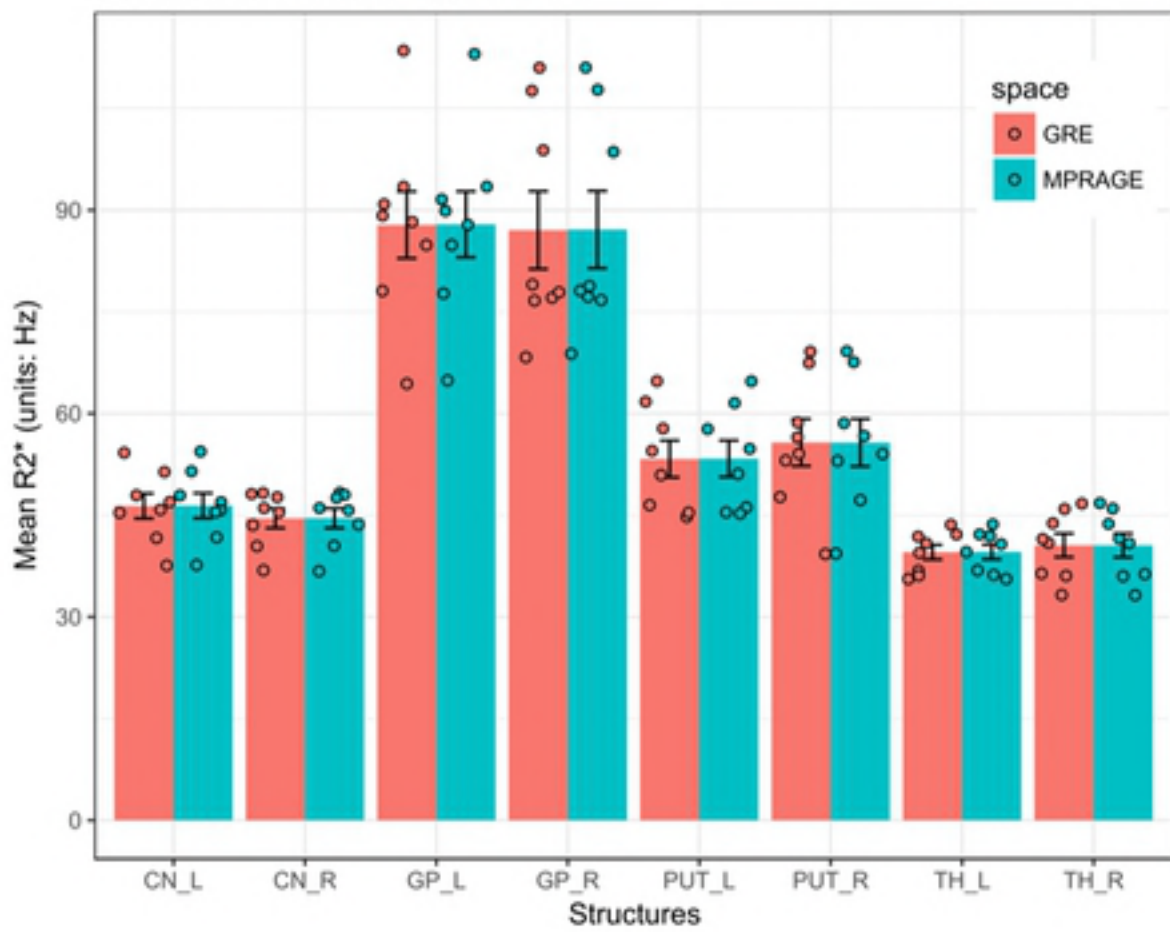

(b) Direct R2\* map Coregistration

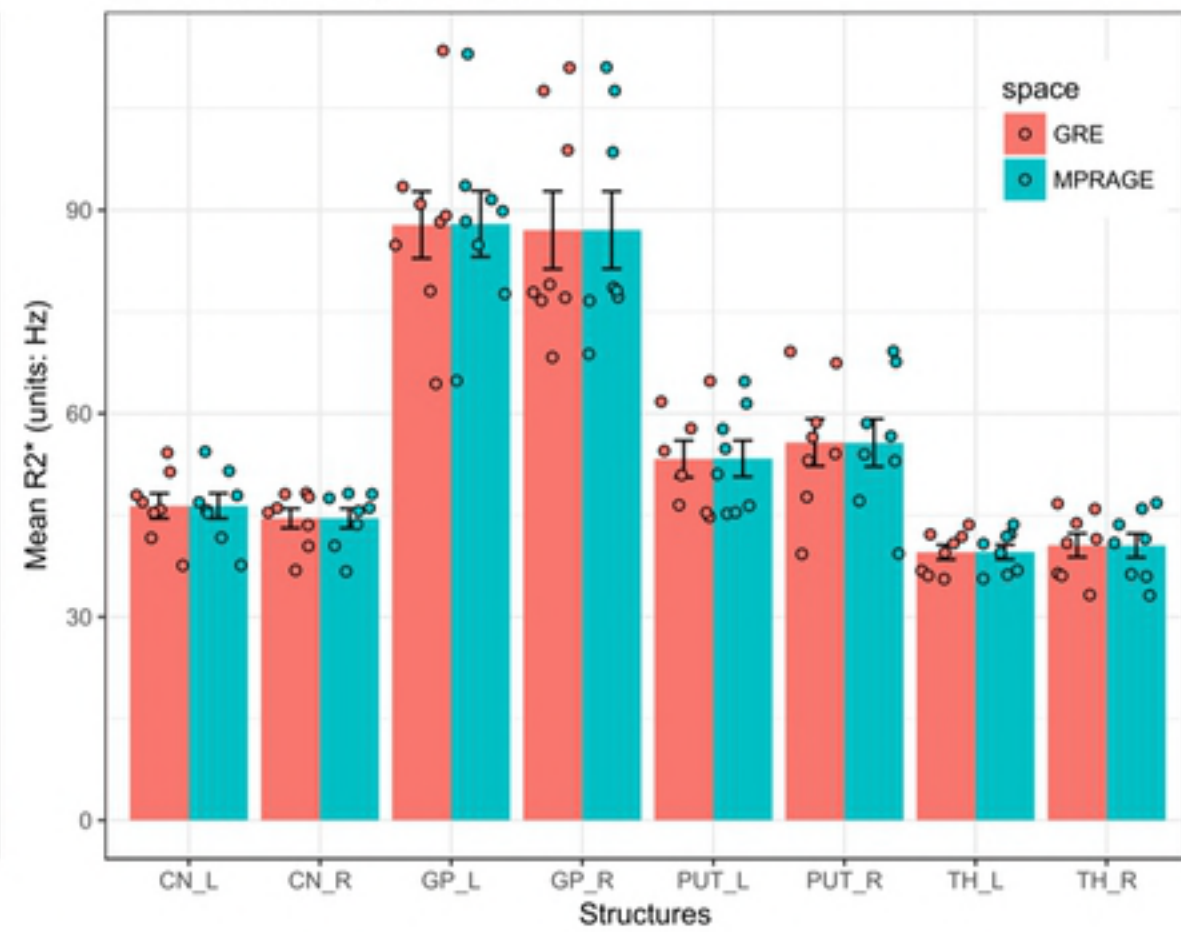

Fig5

(a) Source GRE Coregistration

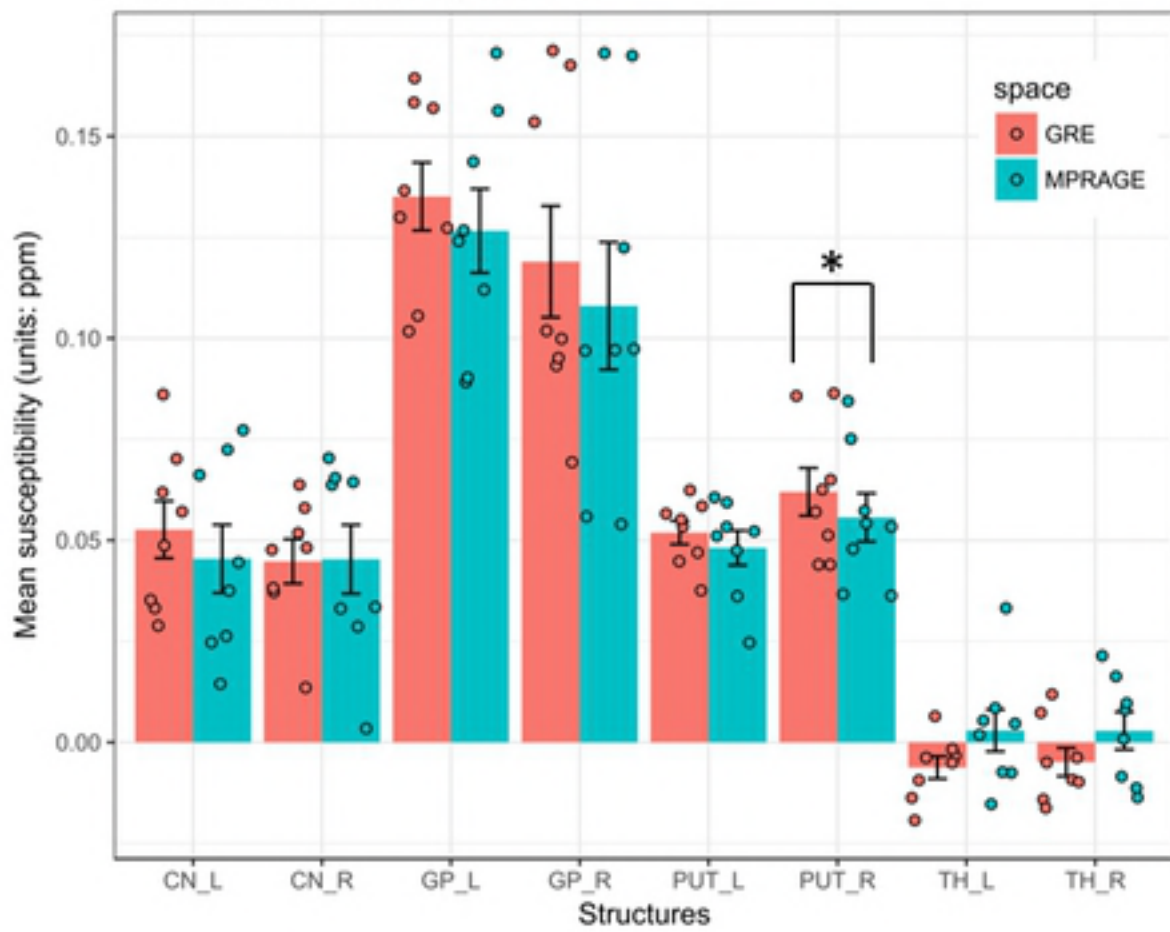

(b) Direct QSM Coregistration

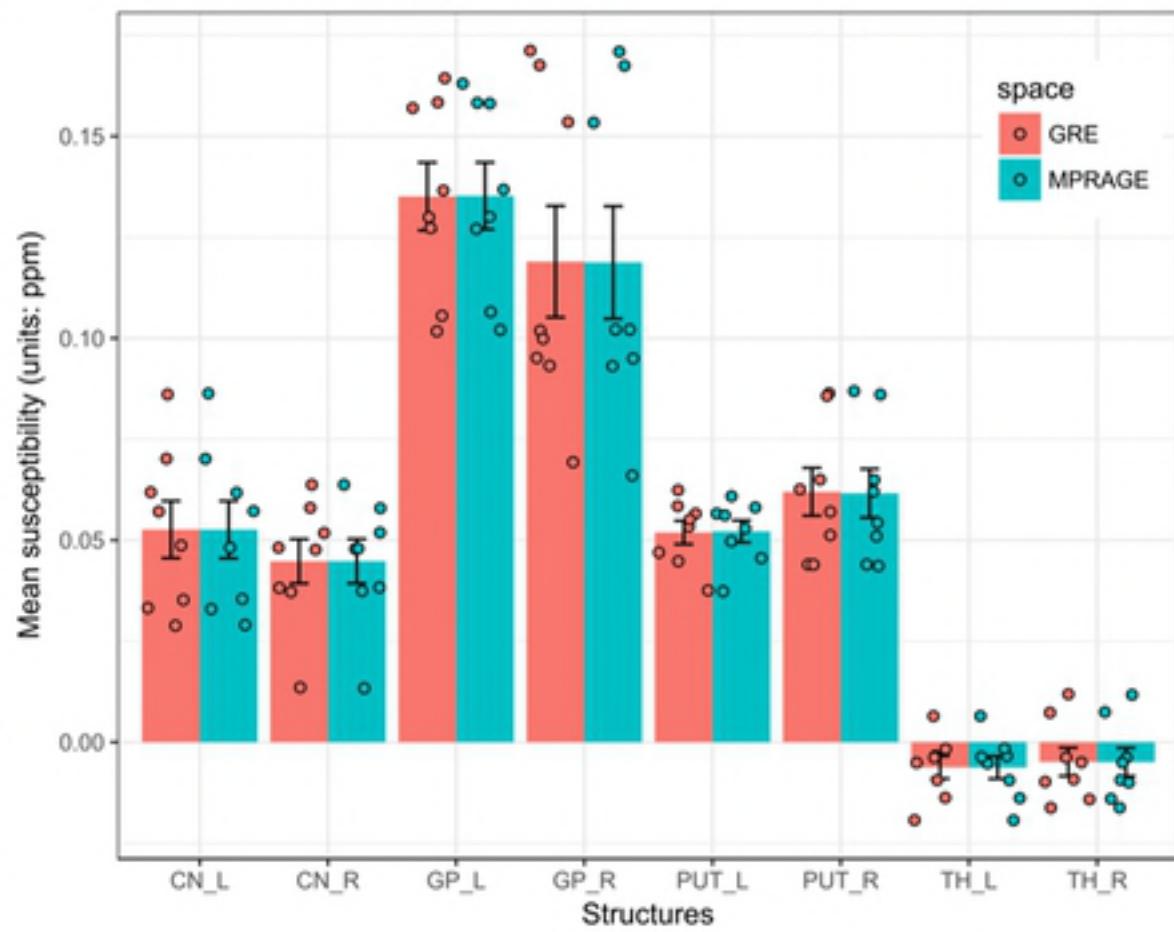

Fig6

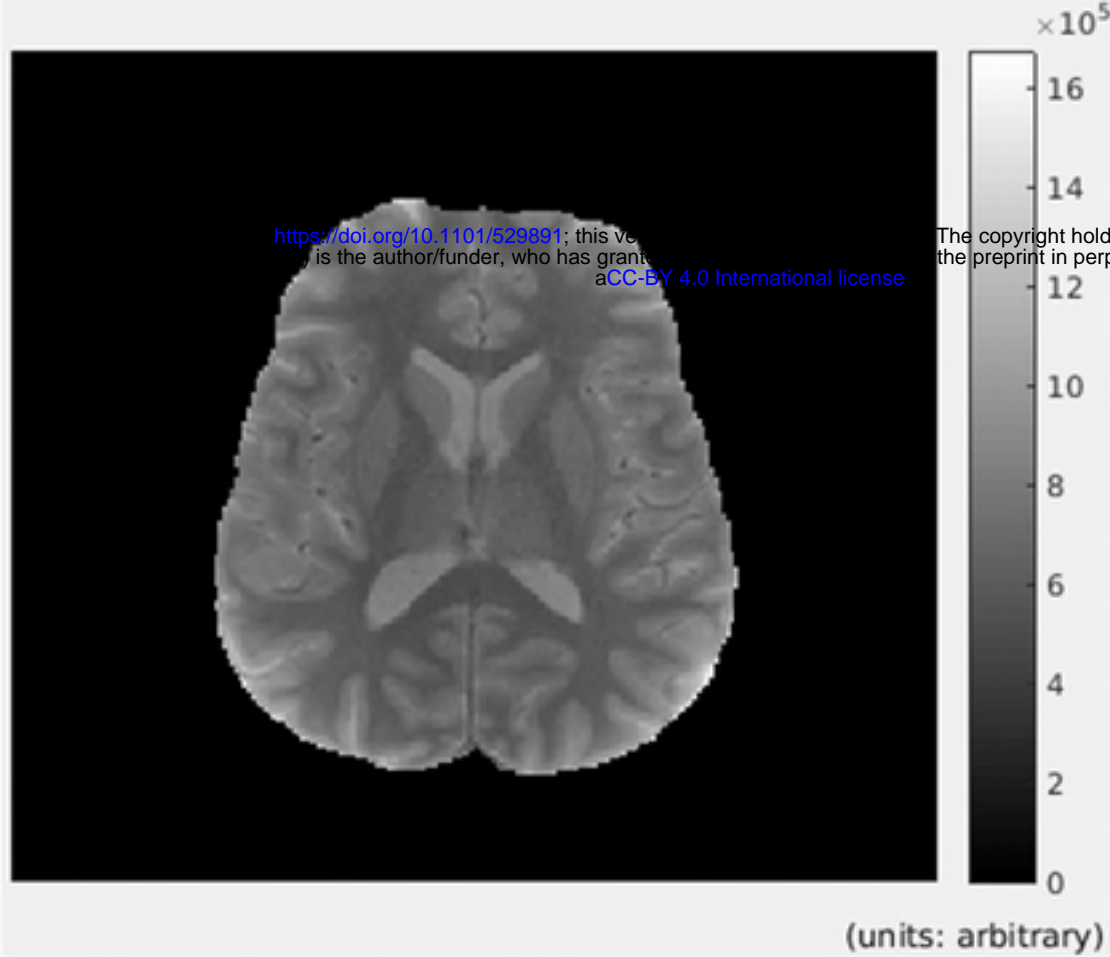

(a) Magnitude in GRE space

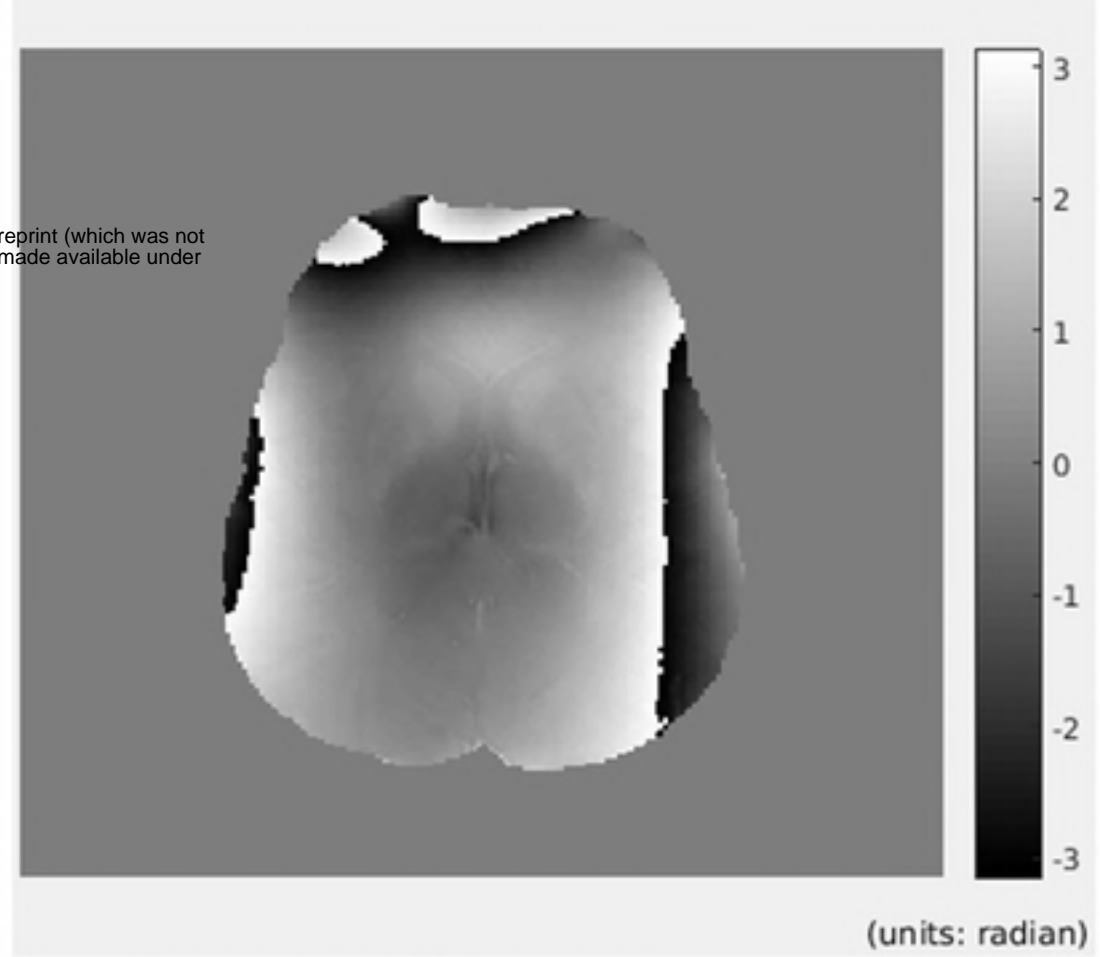

(b) Phase in GRE space

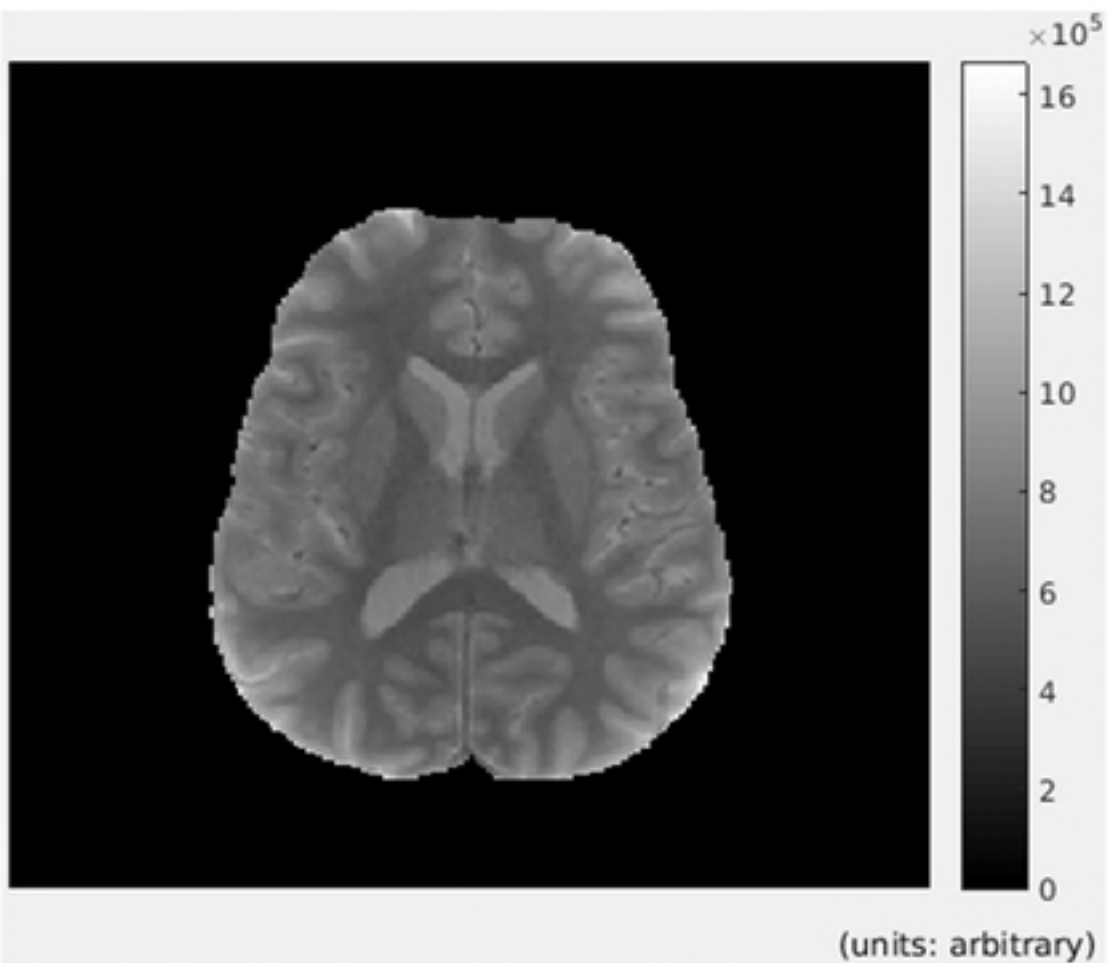

(c) Magnitude in interpolated GRE space

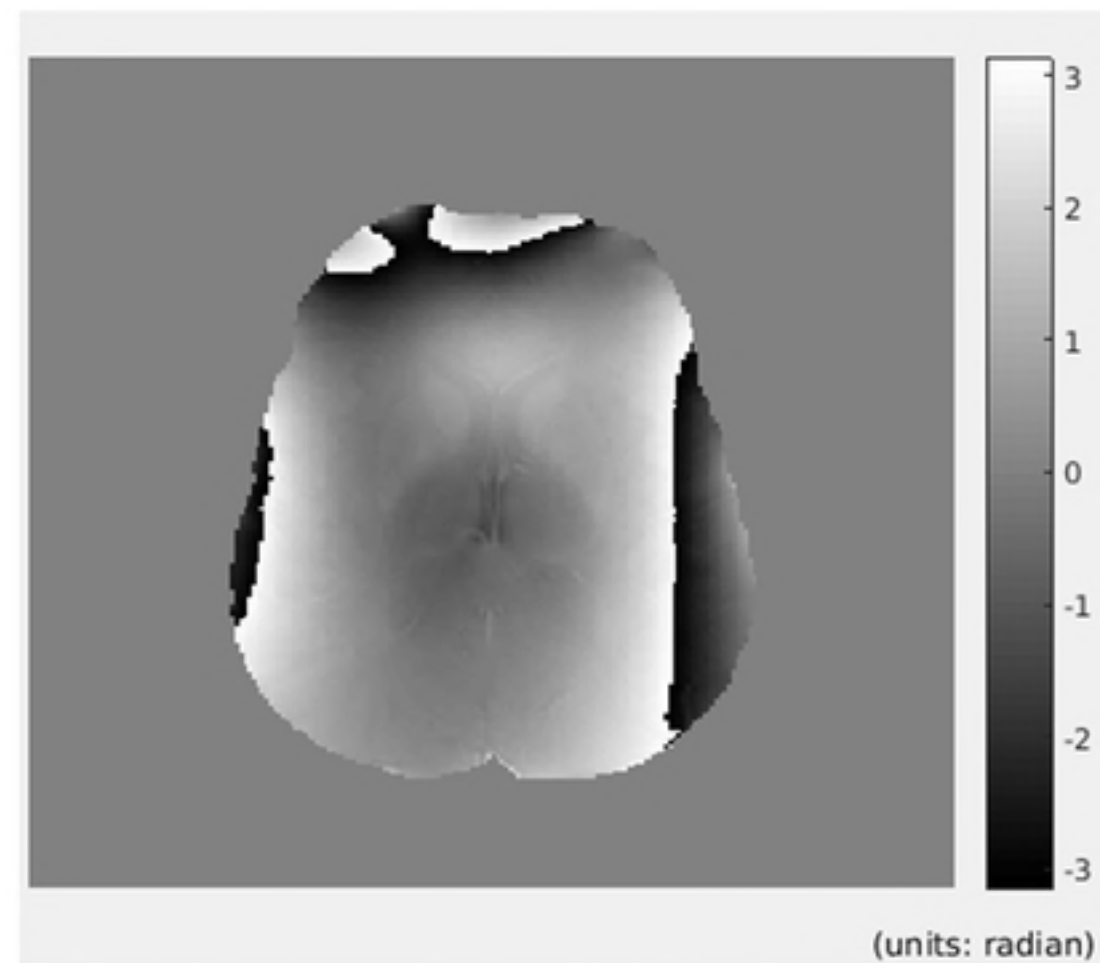

(d) Phase in interpolated GRE space

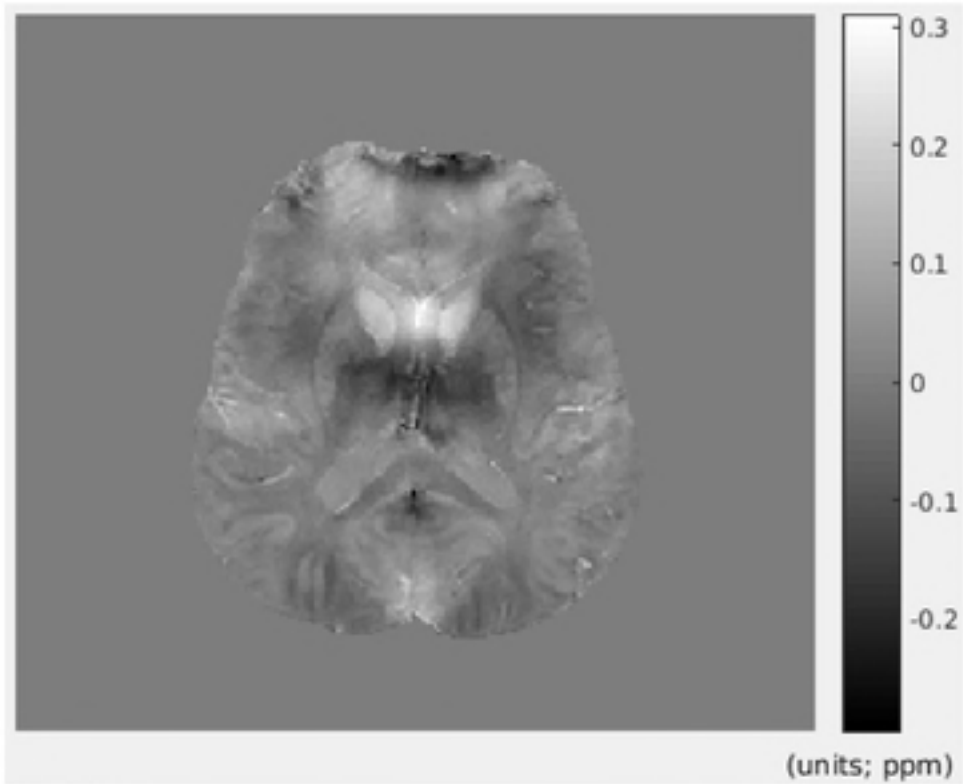

(a)

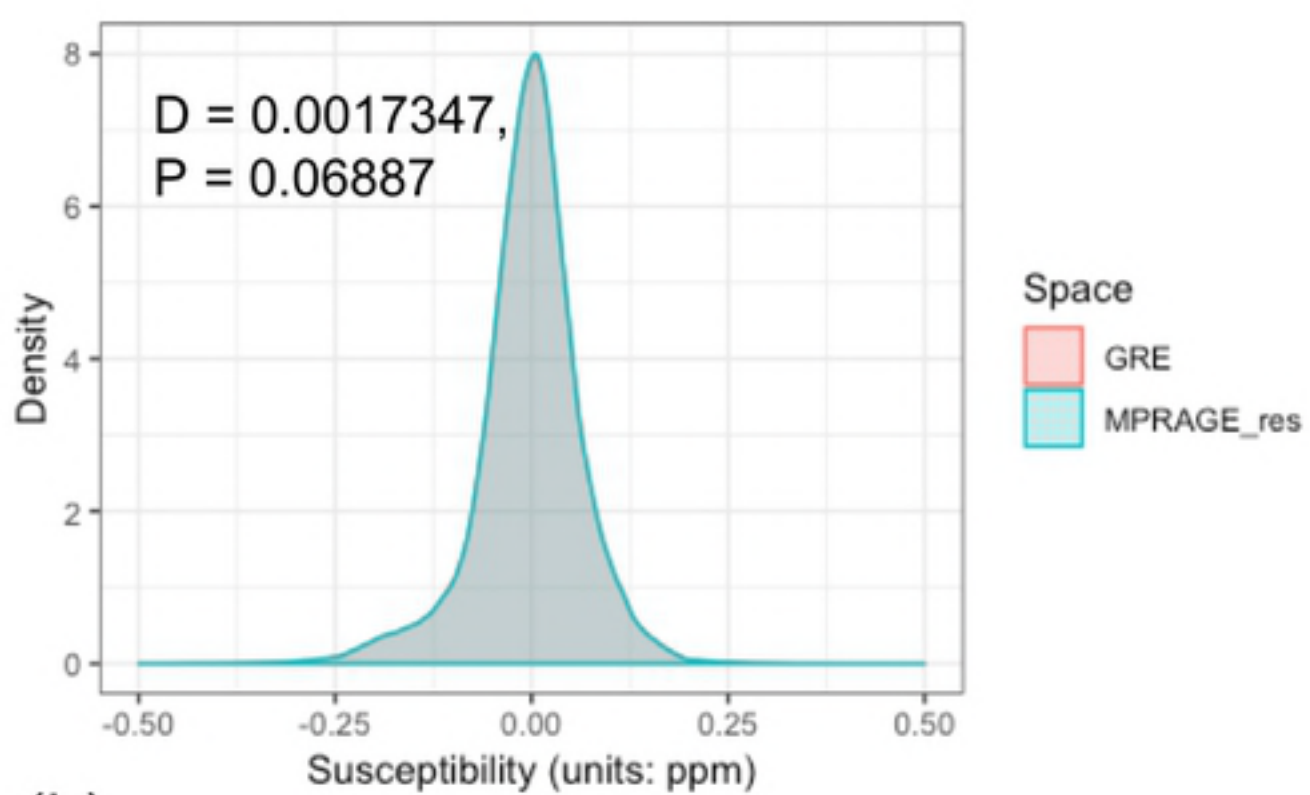

(b)

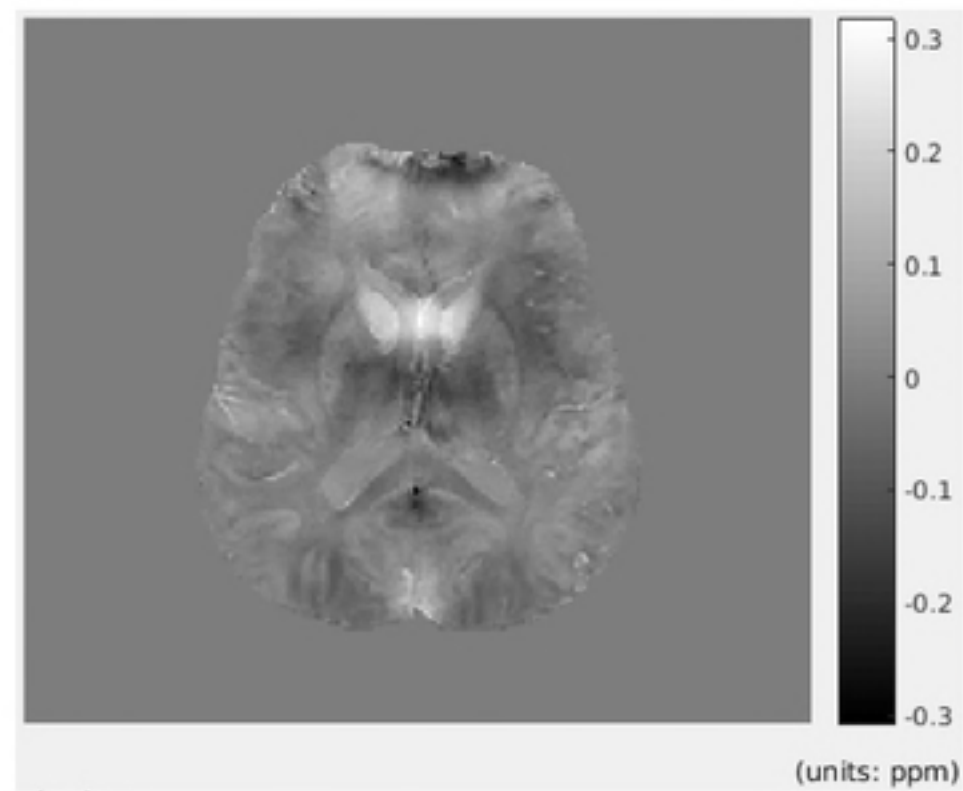

(c)

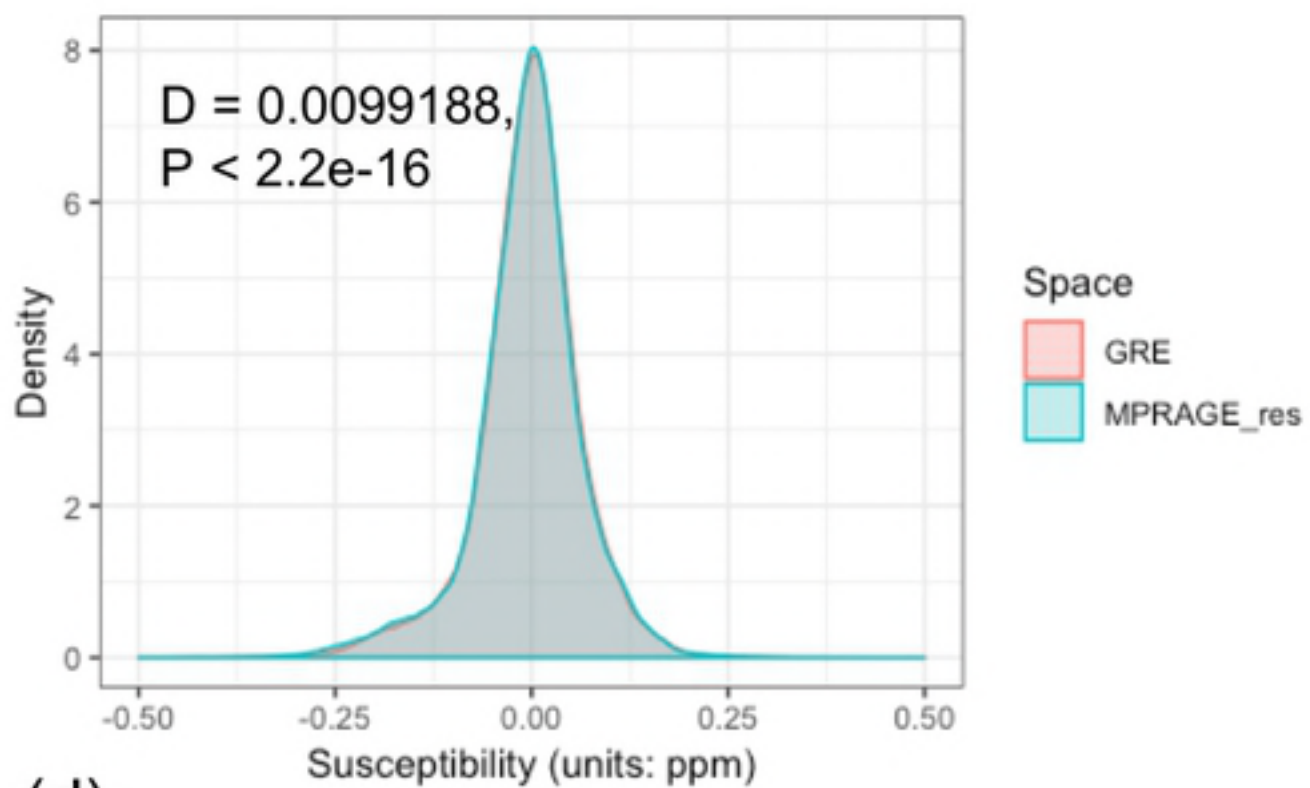

(d)

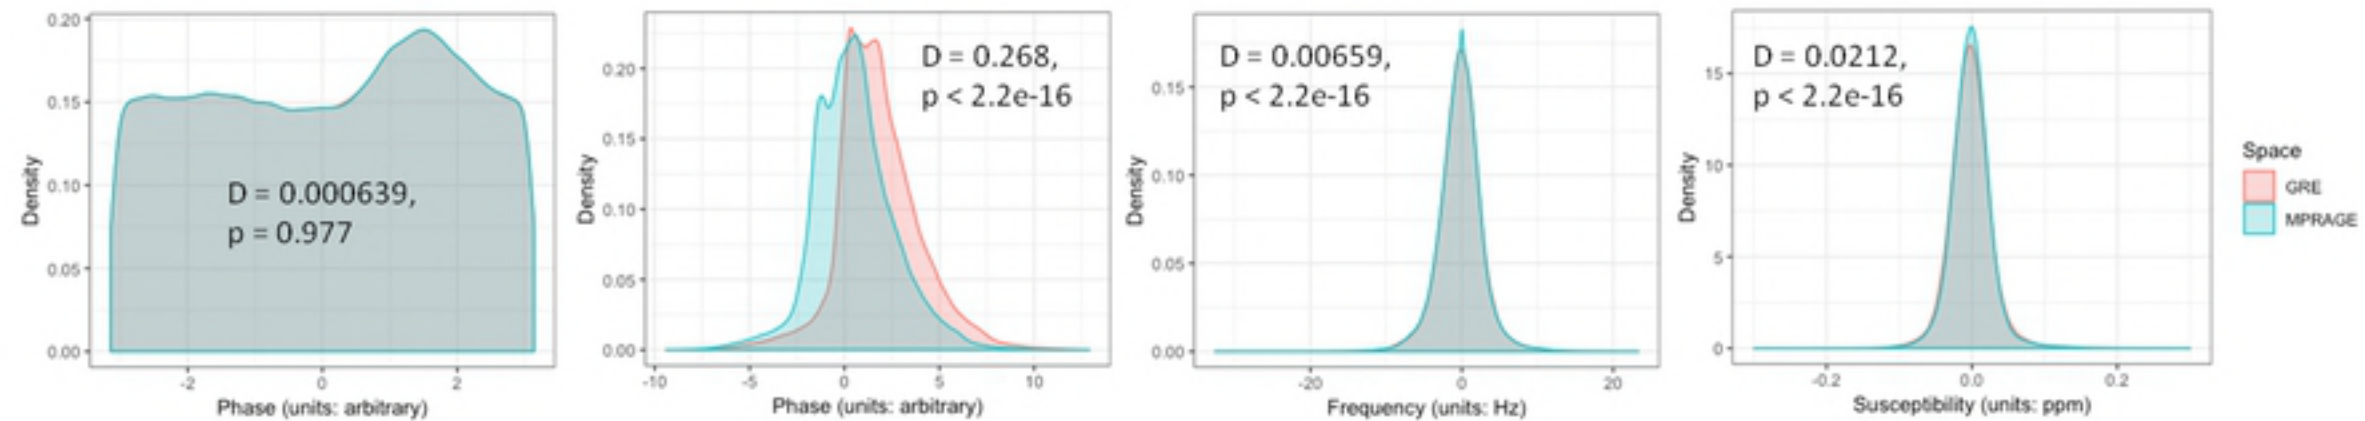

(a) Raw phase

(b) Unwrapped phase

(c) Frequency map

(d) QSM

Fig9
